# Supplementary material
Source: PubMed Central journal article supplement (PMC8629772)
Supplement: mmc1.pdf [file mmc1.pdf]

**Table S1.** The parameters and their acceptable values employed through QikProp module.

| Parameter                | Description                                                                                                          | Acceptable values          |
|--------------------------|----------------------------------------------------------------------------------------------------------------------|----------------------------|
| #amine                   | Number of non-conjugated amine groups                                                                                | 0-1                        |
| #amidine                 | Number of amidine and guanidine groups.                                                                              | 0                          |
| #acid                    | Number of carboxylic acid groups                                                                                     | 0 – 1                      |
| #amide                   | Number of non-conjugated amide groups.                                                                               | 0 – 1                      |
| #rotor                   | Number of non-trivial (not CX3), non-hindered (not alkene, amide, small ring) rotatable bonds                        | 0 – 15                     |
| #rtvFG                   | Number of reactive functional groups                                                                                 | 0 – 2                      |
| CNS                      | Predicted central nervous system activity on a -2 (inactive) to +2 (active) scale.                                   | -2 (inactive), +2 (active) |
| mol_MW                   | Molecular weight of the molecule                                                                                     | 130.0 – 725.0              |
| dipole                   | Computed dipole moment of the molecule                                                                               | 1.0 – 12.5                 |
| SASA                     | Total solvent accessible surface area (SASA) in square angstroms using a probe with a 1.4 Å radius.                  | 300.0 – 1000.0             |
| FOSA                     | Hydrophobic component of the SASA (saturated carbon and attached hydrogen).                                          | 0.0 – 750.0                |
| FISA                     | Hydrophilic component of the SASA (SASA on N, O, H on heteroatoms, carbonyl C).                                      | 7.0 – 330.0                |
| PISA                     | $\pi$ (carbon and attached hydrogen) component of the SASA.                                                          | 0.0 – 450.0                |
| WPSA                     | Weakly polar component of the SASA (halogens, P, and S).                                                             | 0.0 – 175.0                |
| Volume                   | Total solvent-accessible volume in cubic angstroms using a probe with a 1.4 Å radius.                                | 500.0 – 2000.0             |
| donorHB                  | Estimated number of hydrogen bonds that would be donated by the solute to water molecules in an aqueous solution.    | 0.0 – 6.0                  |
| acptHB                   | Estimated number of hydrogen bonds that would be accepted by the solute from water molecules in an aqueous solution. | 2.0 – 20.0                 |
| Dip <sup>2</sup> /V      | Square of the dipole moment divided by the molecular volume.                                                         | 0.0 – 0.13                 |
| ACxDN <sup>0.5</sup> /SA | Index of cohesive interaction in solids.                                                                             | 0.0 – 0.05                 |
| glob                     | Globularity descriptor                                                                                               | 0.75 – 0.95                |
| QPpolrz                  | Predicted polarizability in cubic angstroms.                                                                         | 13.0 – 70.0                |
| QPlogPC16                | Predicted hexadecane/gas partition coefficient.                                                                      | 4.0 – 18.0                 |
| QPlogoct                 | Predicted octanol/gas partition coefficient.                                                                         | 8.0 – 35.0                 |
| QPlogPw                  | Predicted water/gas partition coefficient.                                                                           | 4.0 – 45.0                 |
| QPlogPo/w                | Predicted octanol/water partition coefficient.                                                                       | -2.0 – 6.5                 |
| QPlogS                   | Predicted aqueous solubility, log S.                                                                                 | -6.5 – 0.5                 |
| CIQPlogS                 | Conformation-independent predicted aqueous solubility                                                                | -6.5 – 0.5                 |
| QPlogHERG                | Predicted IC50 value for blockage of HERG K <sup>+</sup> channels.                                                   | concern below -5           |
| QPPCaco                  | Predicted apparent Caco-2 cell permeability in nm/sec.                                                               | <25 poor, >500 great       |
| QPlogBB                  | Predicted brain/blood partition coefficient.                                                                         | -3.0 – 1.2                 |
| QPPMDCK                  | Predicted apparent MDCK cell permeability in nm/sec.                                                                 | <25 poor, >500 great       |
| QPlogKp                  | Predicted skin permeability, log Kp.                                                                                 | -8.0 – -1.0                |
| IP(eV)                   | PM3 calculated ionization potential (negative of HOMO energy).                                                       | 7.9 – 10.5                 |
| EA(eV)                   | PM3 calculated electron affinity (negative of LUMO energy).                                                          | -0.9 – 1.7                 |

|                            |                                                                                          |                                     |
|----------------------------|------------------------------------------------------------------------------------------|-------------------------------------|
| #metab                     | Number of likely metabolic reactions.                                                    | 1 – 8                               |
| QPlogKhsa                  | Prediction of binding to human serum albumin.                                            | -1.5 – 1.5                          |
| HumanOralAbsorption        | Predicted qualitative human oral absorption                                              | 1, 2, or 3 for low, medium, or high |
| PercentHumanOralAbsorption | Predicted human oral absorption on 0 to 100% scale.                                      | >80% is high<br><25% is poor        |
| SAfluorine                 | Solvent-accessible surface area of fluorine atoms.                                       | 0.0 – 100.0                         |
| SAamideO                   | Solvent-accessible surface area of amide oxygen atoms.                                   | 0.0 – 35.0                          |
| PSA                        | Van der Waals surface area of polar nitrogen and oxygen atoms and carbonyl carbon atoms. | 7.0 – 200.0                         |
| #NandO                     | Number of nitrogen and oxygen atoms.                                                     | 2 – 15                              |
| RuleOfFive                 | Number of violations of Lipinski's rule of five                                          | maximum is 4                        |
| RuleOfThree                | Number of violations of Jorgensen's rule of three.                                       | maximum is 3                        |
| #ringatoms                 | Number of atoms in a ring                                                                |                                     |
| #in34                      | Number of atoms in 3- or 4-membered rings                                                |                                     |
| #in56                      | Number of atoms in 5- or 6-membered rings                                                |                                     |
| #nonHatm                   | Number of heavy atoms (nonhydrogen atoms)                                                |                                     |
| Jm                         | Predicted maximum transdermal transport rate                                             |                                     |

**Table S2.** The predicted ADME properties for top 20 best compounds including reference compound from the SwissADME server.

| Compound                        | GI absorption | BBB permeant | CYP1A2 | CYP2C19 | CYP2C9 | CYP2D6 | CYP3A4 | Lipinski rule             | PAINS   | Brenk                                     |
|---------------------------------|---------------|--------------|--------|---------|--------|--------|--------|---------------------------|---------|-------------------------------------------|
| Crystal Structure (PDB ID:6W6Y) | Low           | No           | No     | No      | No     | No     | No     | Yes; 1 violation: NorO>10 | 0 alert | 1 alert: phosphor                         |
| ZINC00000082673                 | High          | No           | Yes    | No      | Yes    | Yes    | Yes    | Yes; 0 violation          | 0 alert | 0 alert                                   |
| ZINC000036569382                | High          | No           | No     | No      | No     | No     | No     | Yes; 0 violation          | 0 alert | 0 alert                                   |
| ZINC000003830180                | Low           | No           | No     | No      | No     | No     | No     | Yes; 1 violation: NorO>10 | 0 alert | 1 alert: phosphor                         |
| ZINC000006112607                | High          | No           | Yes    | No      | No     | No     | No     | Yes; 0 violation          | 0 alert | 0 alert                                   |
| ZINC000014116837                | High          | No           | No     | Yes     | Yes    | No     | Yes    | Yes; 0 violation          | 0 alert | 0 alert                                   |
| ZINC000121003678                | High          | Yes          | Yes    | Yes     | Yes    | Yes    | Yes    | Yes; 0 violation          | 0 alert | 0 alert                                   |
| ZINC000217844024                | High          | No           | Yes    | No      | No     | No     | No     | Yes; 0 violation          | 0 alert | 0 alert                                   |
| ZINC000096223736                | High          | No           | Yes    | Yes     | Yes    | Yes    | Yes    | Yes; 0 violation          | 0 alert | 0 alert                                   |
| ZINC000097036564                | High          | No           | Yes    | No      | No     | No     | No     | Yes; 0 violation          | 0 alert | 0 alert                                   |
| ZINC000237938532                | High          | No           | No     | No      | No     | No     | No     | Yes; 0 violation          | 0 alert | 0 alert                                   |
| ZINC000096232566                | High          | No           | Yes    | No      | No     | Yes    | Yes    | Yes; 0 violation          | 0 alert | 0 alert                                   |
| ZINC000003869813                | Low           | No           | No     | No      | No     | No     | No     | Yes; 1 violation: NorO>10 | 0 alert | 1 alert: phosphor                         |
| ZINC000097036607                | High          | No           | No     | No      | No     | No     | No     | Yes; 0 violation          | 0 alert | 0 alert                                   |
| ZINC000097036605                | High          | No           | No     | Yes     | Yes    | No     | No     | Yes; 0 violation          | 0 alert | 0 alert                                   |
| ZINC000079784201                | High          | No           | Yes    | Yes     | No     | Yes    | Yes    | Yes; 0 violation          | 0 alert | 0 alert                                   |
| ZINC000426746041                | High          | No           | Yes    | Yes     | No     | yes    | Yes    | Yes; 0 violation          | 0 alert | 0 alert                                   |
| ZINC000113844870                | Low           | No           | No     | No      | No     | No     | No     | Yes; 1 violation: NorO>10 | 0 alert | 2 alerts: het-C-het_not_in_ring, phosphor |
| ZINC000000001793                | Low           | No           | No     | No      | No     | No     | No     | Yes; 0 violation          | 0 alert | 1 alert: isolated_alkene                  |
| ZINC000009504042                | High          | No           | Yes    | Yes     | Yes    | Yes    | Yes    | Yes; 0 violation          | 0 alert | 0 alert                                   |
| ZINC000005615258                | Low           | No           | No     | No      | No     | No     | No     | Yes; 1 violation: NorO>10 | 0 alert | 1 alert: phosphor                         |

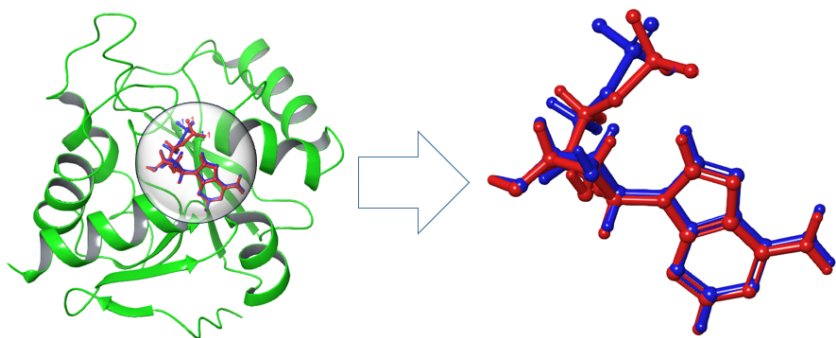

**Figure S1.** Comparison between the docked pose (red) and the crystal (blue) binding pose of ADP to NSP3 (ADP ribose phosphatase, PDB ID: 6W6Y).

| No | FDA approved drugs/ Structure/ Docking score                                                                                              | No | FDA approved drugs/ Structure/ Docking score                                                                                          |
|----|-------------------------------------------------------------------------------------------------------------------------------------------|----|---------------------------------------------------------------------------------------------------------------------------------------|
| 1  | Ladevina; Lenangio<br>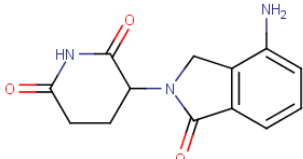<br>Docking Score: -7.788 kcal/mol | 6  | Cladribine<br><br>Docking Score: -7.626 kcal/mol    |
| 2  | Mycophenolic acid<br><br>Docking Score: -7.758 kcal/mol  | 7  | Azathioprine<br><br>Docking Score: -7.610 kcal/mol   |
| 3  | Clofarabine<br><br>Docking Score: -7.757 kcal/mol       | 8  | Adenosine<br><br>Docking Score: -7.573 kcal/mol    |
| 4  | Fludarabine<br><br>Docking Score: -7.709 kcal/mol      | 9  | Abacavir<br><br>Docking Score: -7.251 kcal/mol    |
| 5  | Vidarabine<br><br>Docking Score: -7.700 kcal/mol       | 10 | Regadenoson<br><br>Docking Score: -7.201 kcal/mol |

Figure S2. Top ten hits from the FDA approved drug compounds.

| No        | Zinc ID/ Structure/ SMILE_code                                                                                                                                                              | Docking score    | # STAR | # Cluster ID | Centroid    |
|-----------|---------------------------------------------------------------------------------------------------------------------------------------------------------------------------------------------|------------------|--------|--------------|-------------|
| Ref. Comp | 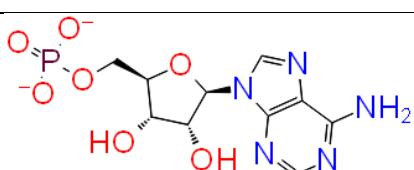                                                                                                           | -9.752 kcal/mol  | 0      | 11           | No Centroid |
| 1         | ZINC000000082673<br><br><chem>c1cccc(c12)[nH]c(n2)CSc([nH]c3=O)nc(c34)cccc4</chem>                         | -11.691 kcal/mol | 0      | 11           | No Centroid |
| 2         | ZINC000036569382<br><br><chem>n1c[nH]c(c12)ncnc2N[C@@H](C([O-])=O)Cc3c[nH]c(c34)cccc4</chem>               | -11.642 kcal/mol | 0      | 11           | No Centroid |
| 3         | ZINC000003830180<br><br><chem>[O-]P([O-])(=O)OC[C@H]1[C@@H](O)[C@@H](O)[C@H](O1)n(cn2)c(c23)ncnc3N</chem> | -11.050 kcal/mol | 0      | 11           | No Centroid |
| 4         | ZINC000006112607<br><br><chem>Nc1nc([nH]n1)SCC(=O)c2c[nH]c(c23)cccc3</chem>                              | -10.952 kcal/mol | 0      | 11           | No Centroid |
| 5         | ZINC000014116837<br><br><chem>c1cccc(c12)[nH]c(C)c2C(=O)[C@H](C)Sc(n[nH]3)n(c3=O)CCOC</chem>             | -10.909 kcal/mol | 0      | 11           | No Centroid |
| 6         | ZINC000121003678<br><br><chem>c1cccc(c12)[nH]c(n2)[C@H](C(C)N)Cc3ccoc(c34)cccc4</chem>                   | -10.772 kcal/mol | 0      | 11           | No Centroid |
| 7         | ZINC000217844024<br><br><chem>[nH]1nc(N)c(Cl)c1C(=O)N2CCCC[C@H]2c(n3)[nH]c(c34)ccc(F)c4</chem>           | -10.765 kcal/mol | 0      | 11           | No Centroid |

|    |                                                                                                                                                                                      |                  |   |    |             |
|----|--------------------------------------------------------------------------------------------------------------------------------------------------------------------------------------|------------------|---|----|-------------|
| 8  | ZINC000096223736<br>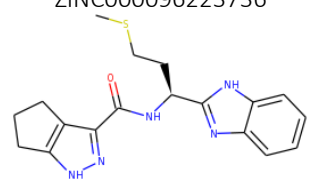<br><chem>C1CCc(c12)n[nH]c2C(=O)N[C@@H](CCSC)c(n3)[nH]c(c34)cccc4</chem>        | -10.486 kcal/mol | 0 | 11 | No Centroid |
| 9  | ZINC000097036564<br><br><chem>n1coc(C)c1C(=O)N[C@H](C([O-])=O)Cc2c[nH]c(c23)cc(F)cc3</chem>         | -10.427 kcal/mol | 0 | 11 | No Centroid |
| 10 | ZINC000237938532<br><br><chem>O1CCC[C@@H]1C(=O)N[C@H](C([O-])=O)Cc2c[nH]c(c23)cc(F)cc3</chem>       | -10.414 kcal/mol | 0 | 11 | No Centroid |
| 11 | ZINC000096232566<br><br><chem>C1CCc(c12)n[nH]c2C(=O)NCCc(n3)[nH]c(c34)cccc4</chem>                 | -10.411 kcal/mol | 0 | 11 | No Centroid |
| 12 | ZINC000003869813<br><br><chem>[O-]P([O-])(=O)OC[C@H]1[C@@H](O)C[C@H](O1)n(cn2)c(c23)ncnc3N</chem> | -10.409 kcal/mol | 0 | 11 | No Centroid |
| 13 | ZINC000097036607<br><br><chem>c1coc(C)c1C(=O)N[C@H](C([O-])=O)Cc2c[nH]c(c23)cc(F)cc3</chem>       | -10.373 kcal/mol | 0 | 11 | No Centroid |
| 14 | ZINC000097036605<br><br><chem>s1cnc(C)c1C(=O)N[C@@H](C([O-])=O)Cc2c[nH]c(c23)cc(F)cc3</chem>      | -10.344 kcal/mol | 0 | 11 | No Centroid |
| 15 | ZINC000079784201<br><br><chem>C1CCc(c12)n[nH]c2C(=O)N[C@@H](C(C)C)c(n3)[nH]c(c34)cccc4</chem>     | -10.336 kcal/mol | 0 | 11 | No Centroid |

|    |                                                                                                                                                                                                     |                     |   |    |                |
|----|-----------------------------------------------------------------------------------------------------------------------------------------------------------------------------------------------------|---------------------|---|----|----------------|
| 16 | ZINC000426746041<br>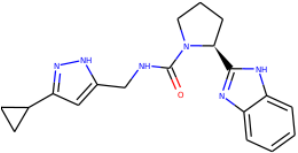<br><chem>C1CC1c([nH]n2)cc2CNC(=O)N3CCC[C@H]3c(n4)[nH]c(c45)cccc5</chem>                       | -10.300<br>kcal/mol | 0 | 11 | No<br>Centroid |
| 17 | ZINC000113844870<br><br><chem>[O-]P([O-])(=O)O[C@@H](O)[C@@H]1[C@@H](O)[C@H](O)[C@@H](O1)n(cn2)c(c23)ncnc3N</chem> | -10.229<br>kcal/mol | 3 | 11 | No<br>Centroid |
| 18 | ZINC000000001793<br><br><chem>OCC1=C[C@@H]([C@@H](O)[C@H]1O)n(cn2)c(c23)ncnc3N</chem>                              | -10.202<br>kcal/mol | 0 | 11 | No<br>Centroid |
| 19 | ZINC000009504042<br><br><chem>[nH]1cccc1C(=O)CSc2ncnc(c23)sc(c3)CC</chem>                                         | -10.195<br>kcal/mol | 0 | 11 | No<br>Centroid |
| 20 | ZINC000005615258<br><br><chem>COP(=O)(OC)OC[C@@H]1[C@@H](O)[C@H](O)[C@@H](O1)n(cn2)c(c23)ncnc3N</chem>           | -9.897<br>kcal/mol  | 0 | 11 | No<br>Centroid |

**Figure S3.** The table represents Zinc ID, structure, SMILE code, docking score, numbers of STARs (represent if the molecule is drug like), cluster IDs (ligand similarity clustering is based on Canvas), and centroid (measures distances to the arithmetic means of clusters) of the top twenty zinc compounds including the reference compound.



|               | Protein-Ligand Complexes                                                            | Crystal Ligand Structure                                                             | Ligand Interaction                                                                    |
|---------------|-------------------------------------------------------------------------------------|--------------------------------------------------------------------------------------|---------------------------------------------------------------------------------------|
| ZINC000082673 |    |     |    |
| ZINC036569382 |    |    |    |
| ZINC003830180 |    |   |    |
| ZINC006112607 |  |  |  |
| ZINC014116837 |  |  |  |
| ZINC121003678 |  |   |  |
| ZINC217844024 |  |  |  |

|               |                                                                                     |                                                                                      |                                                                                       |
|---------------|-------------------------------------------------------------------------------------|--------------------------------------------------------------------------------------|---------------------------------------------------------------------------------------|
| ZINC096223736 | 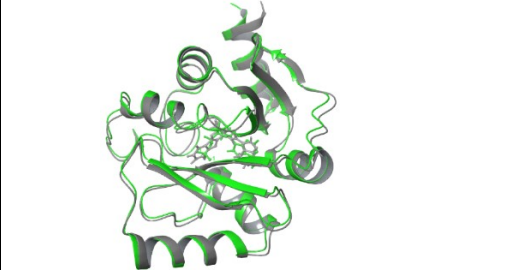   |    |    |
| ZINC097036564 |    |    |    |
| ZINC237938532 |   |   |   |
| ZINC096232566 |  |  |  |
| ZINC003869813 |  |  |  |
| ZINC097036607 |  |  |  |
| ZINC097036605 |  |  |  |

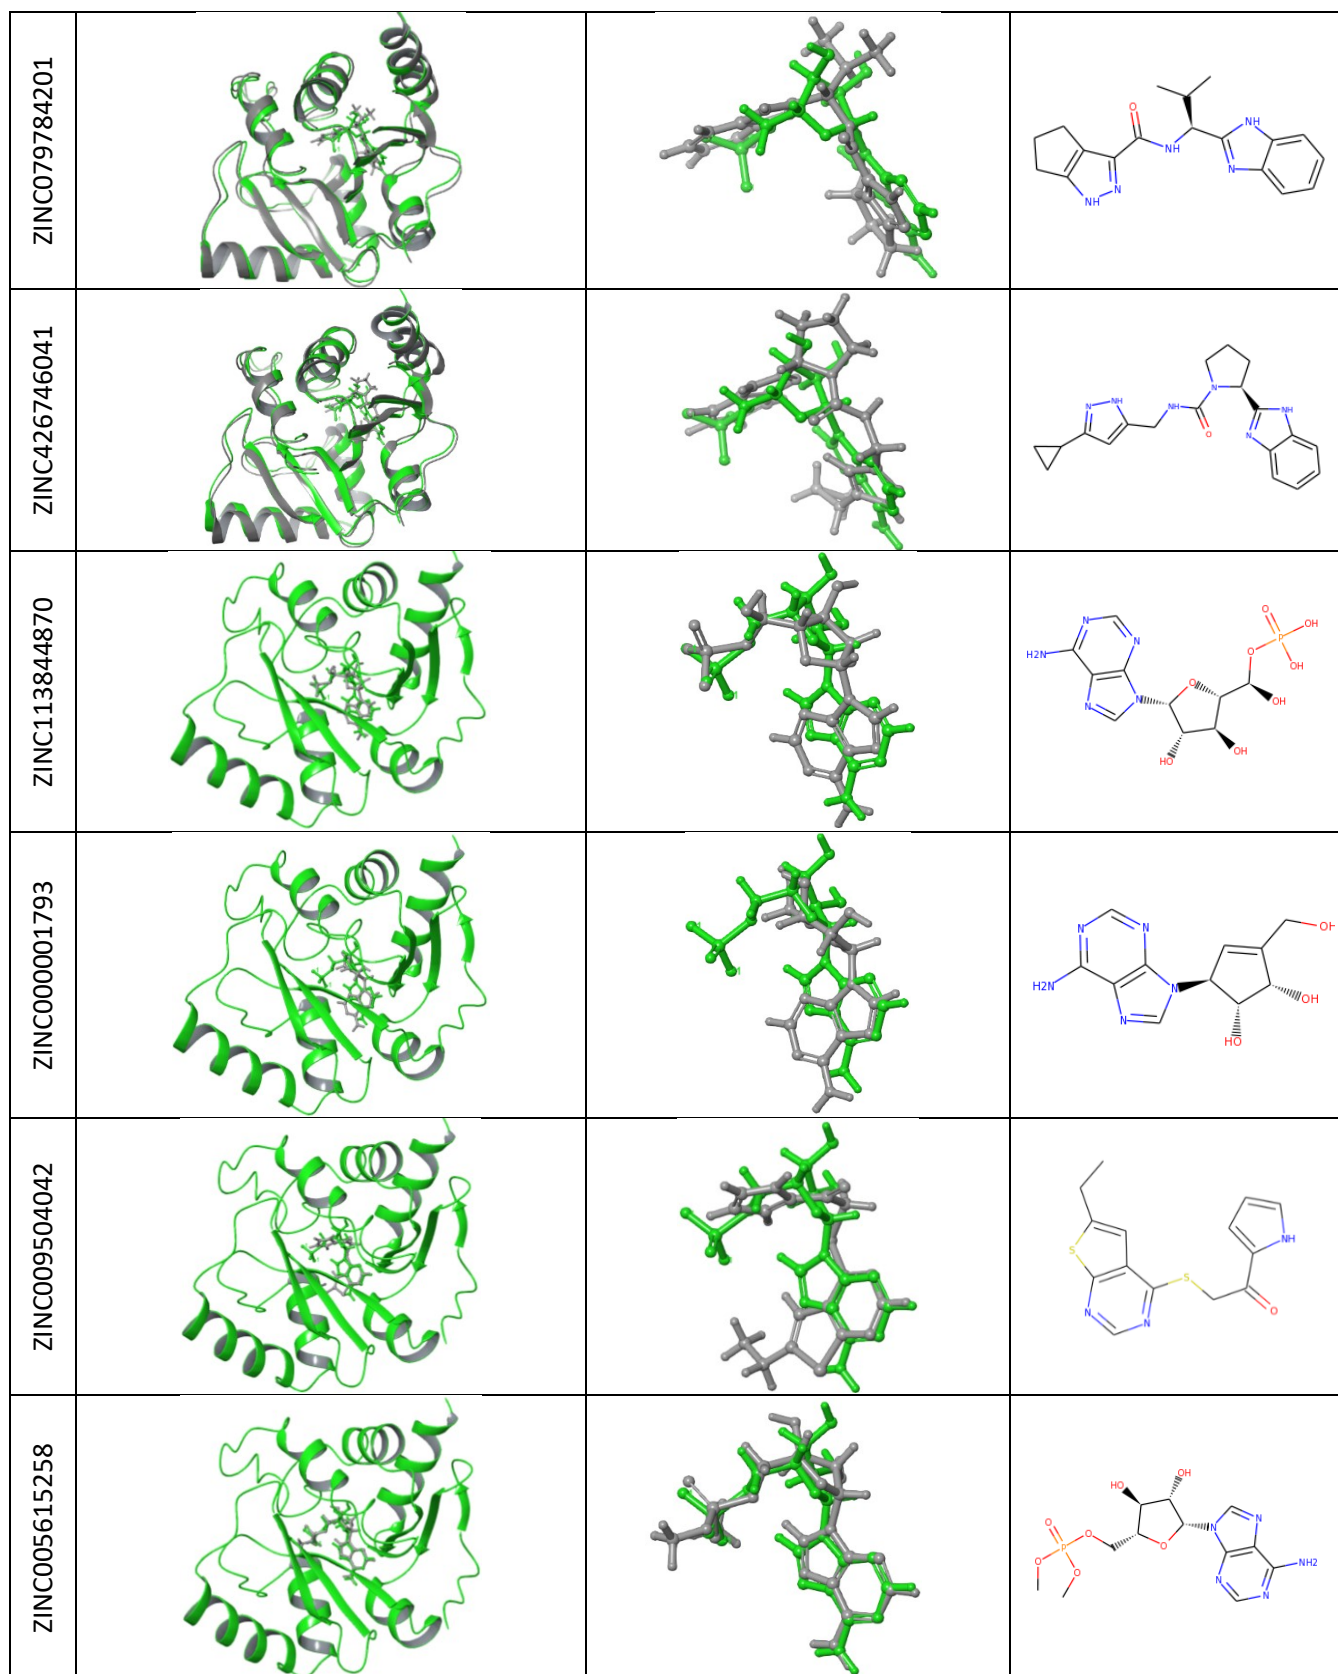

**Figure S4.** Comparison between the docked complex (gray) of the top twenty ligands and the crystal complex structure (green). The last column represents the ligand chemical structure.

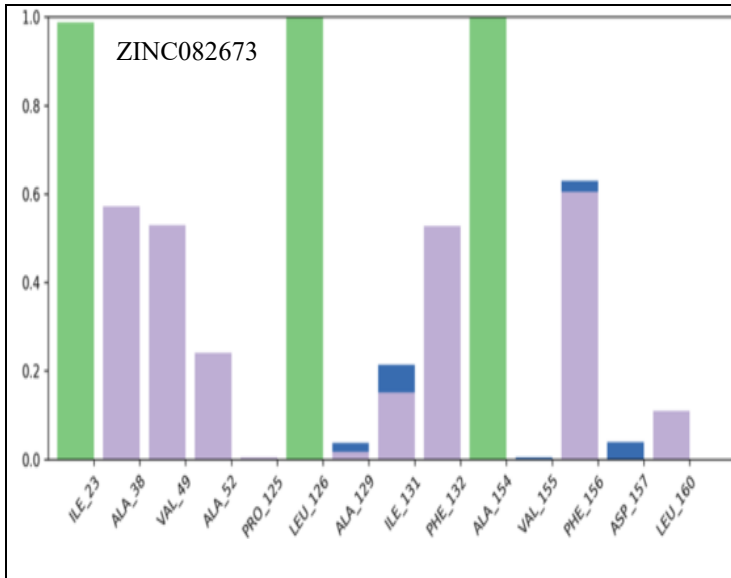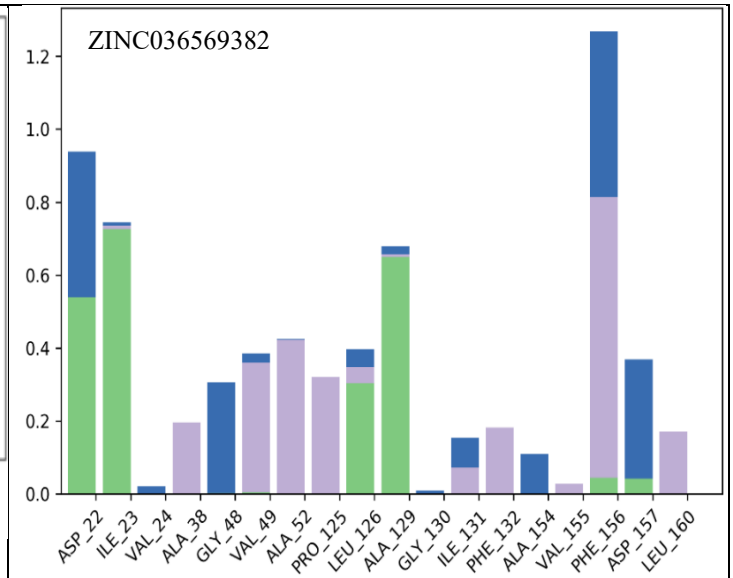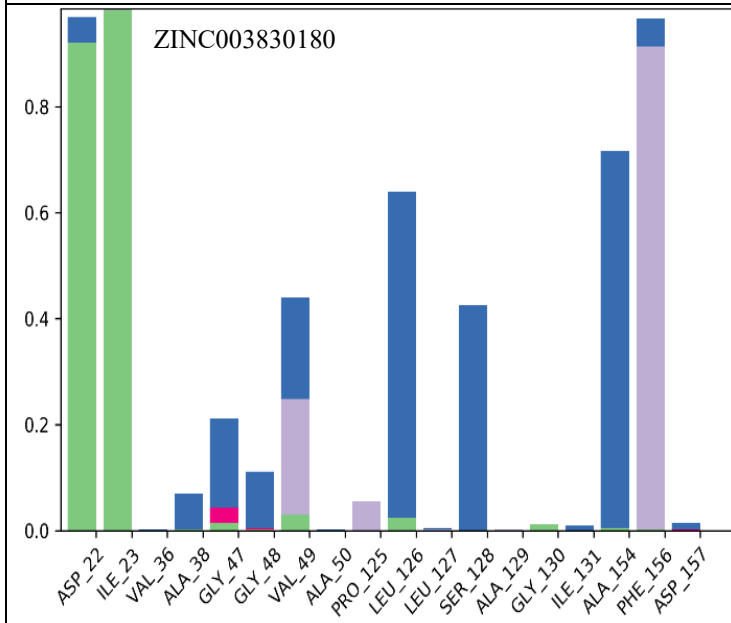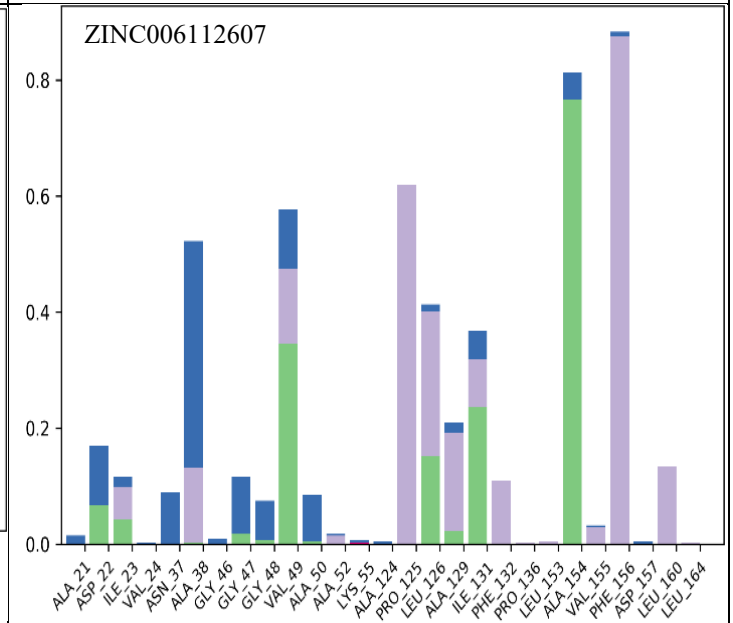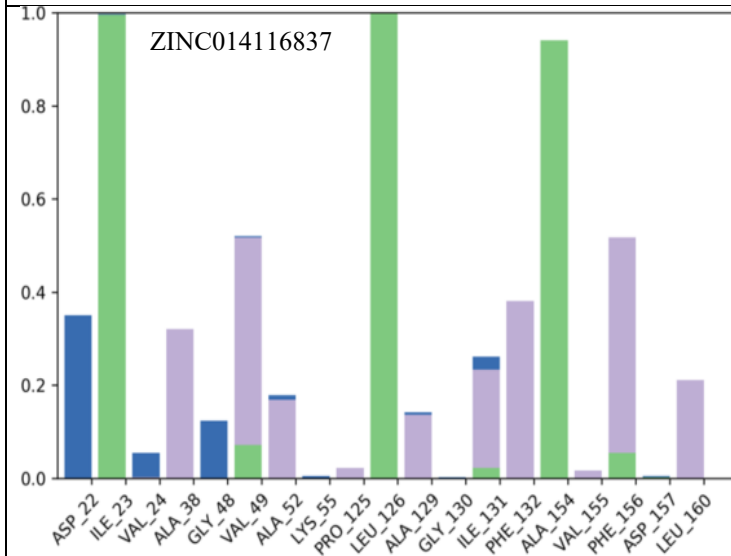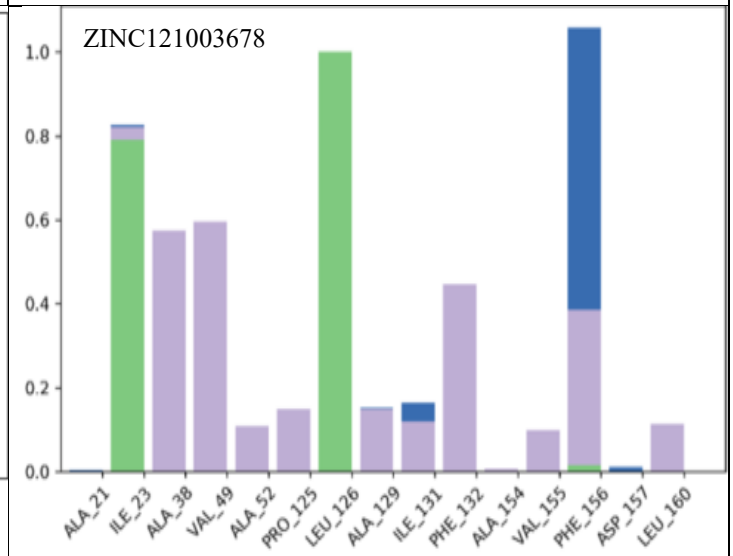



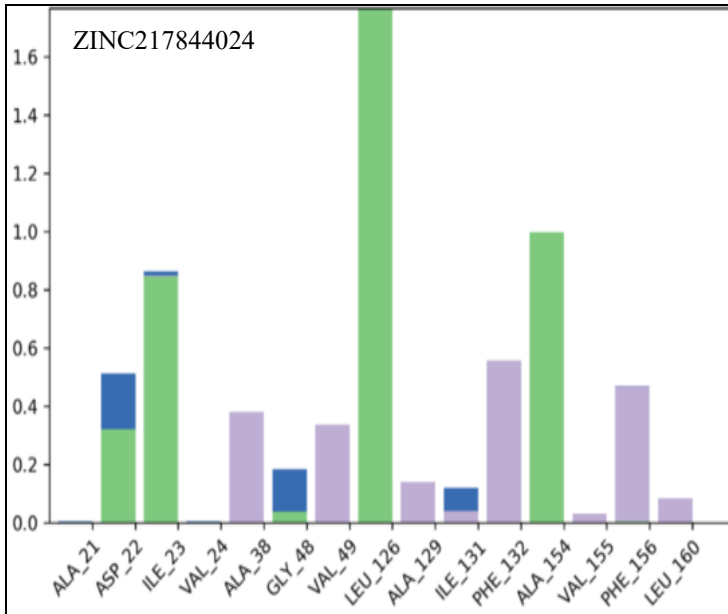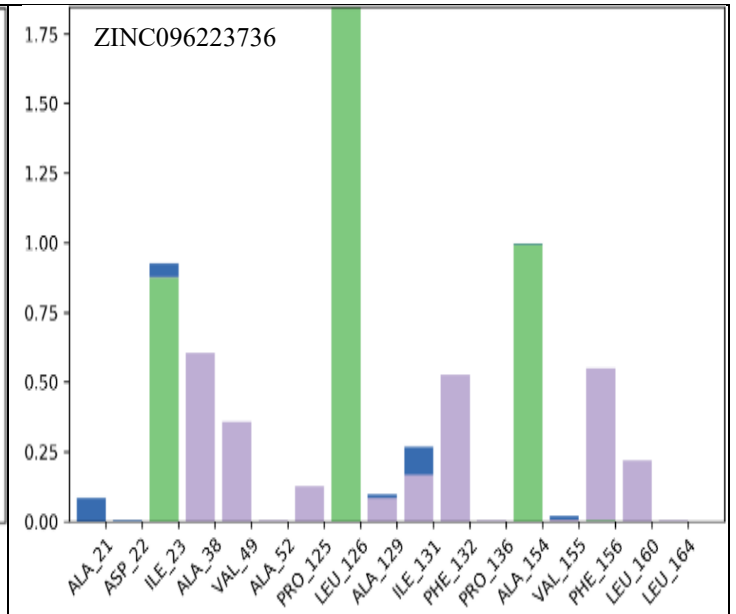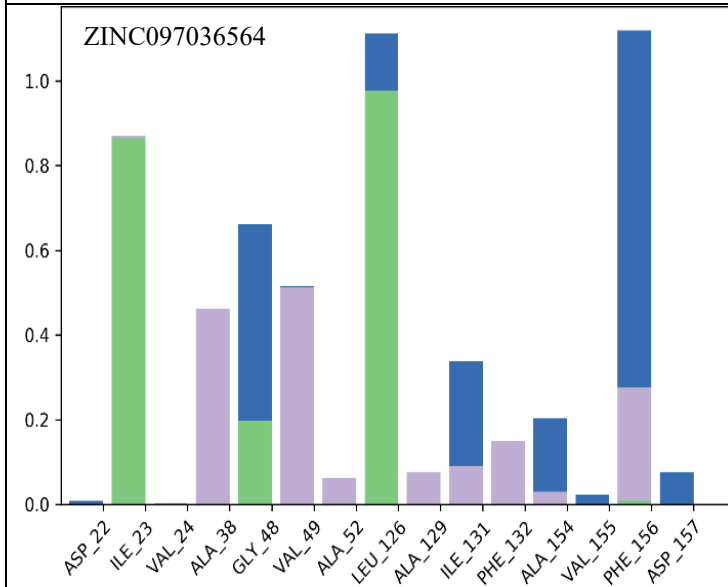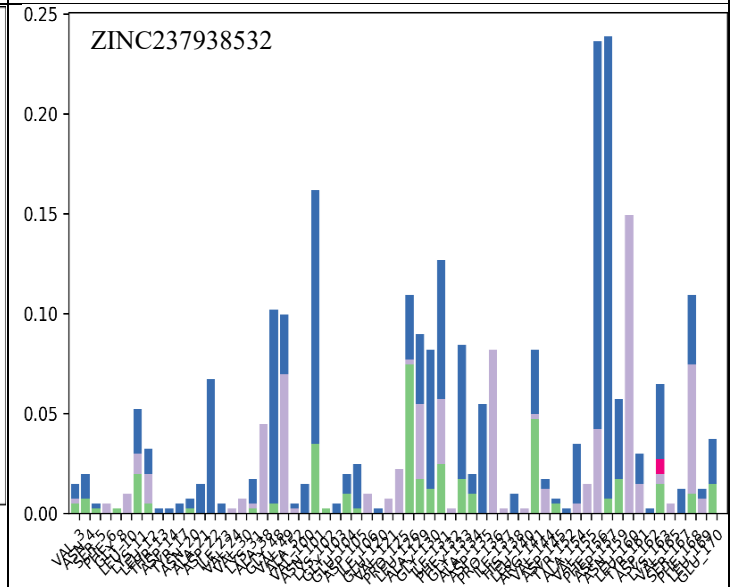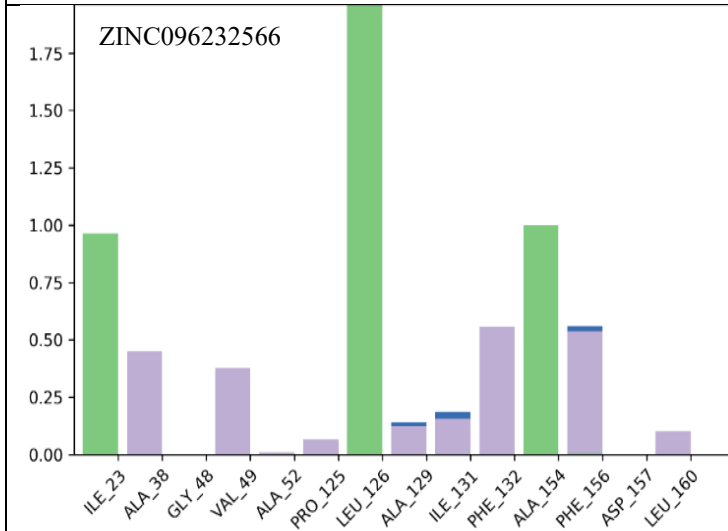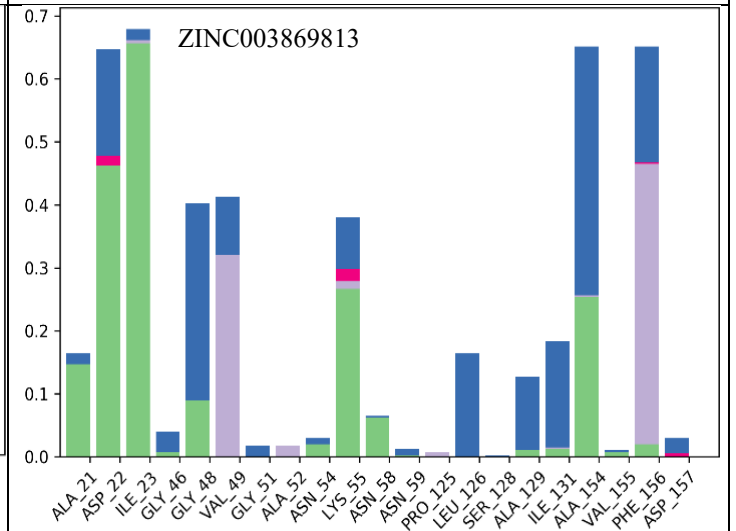

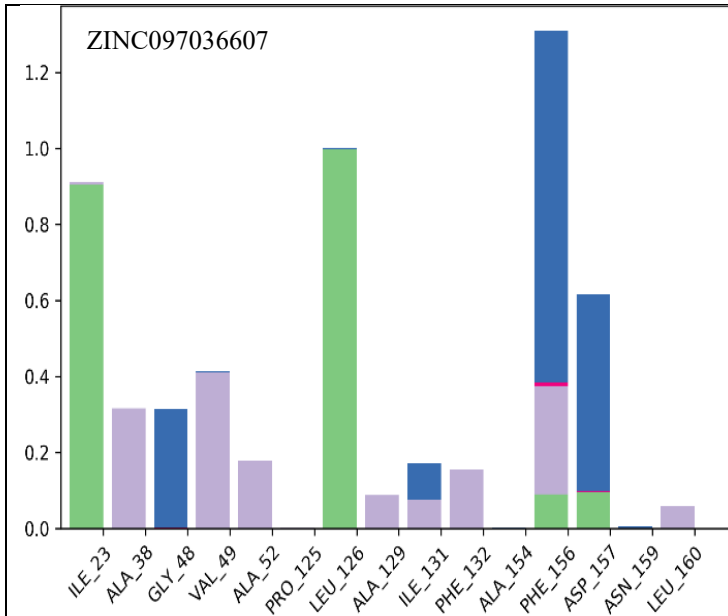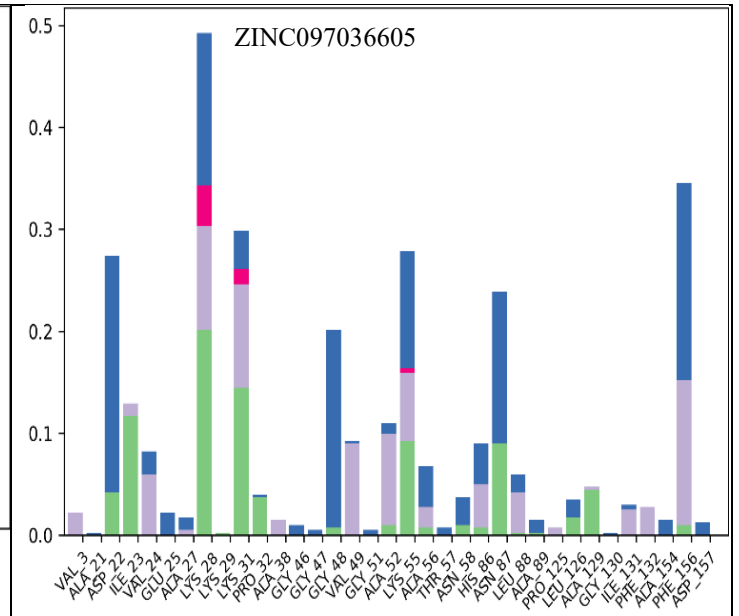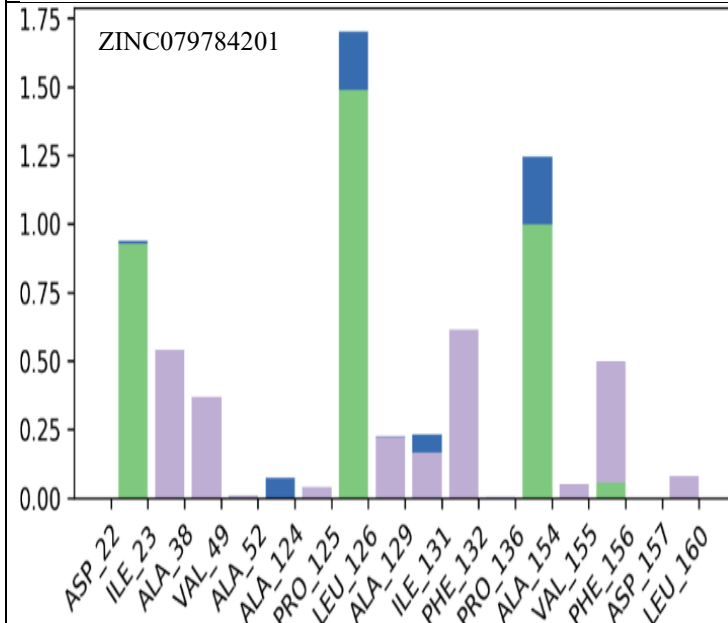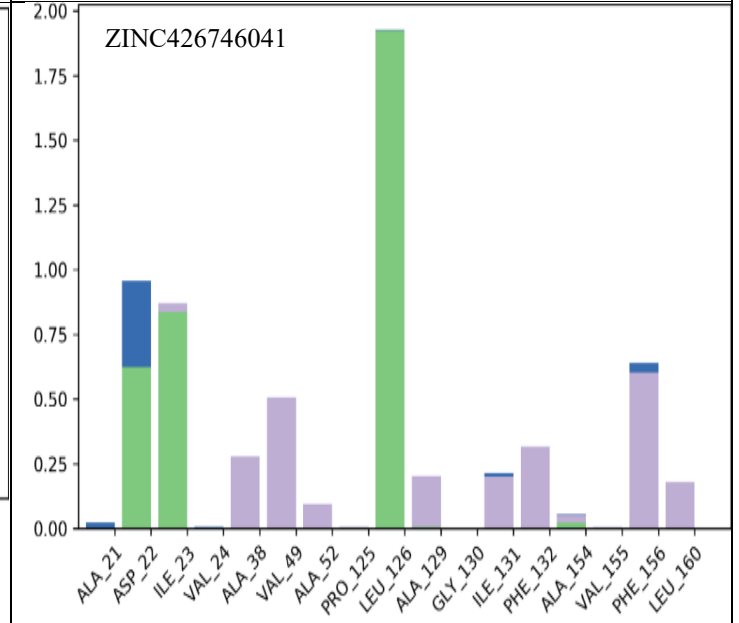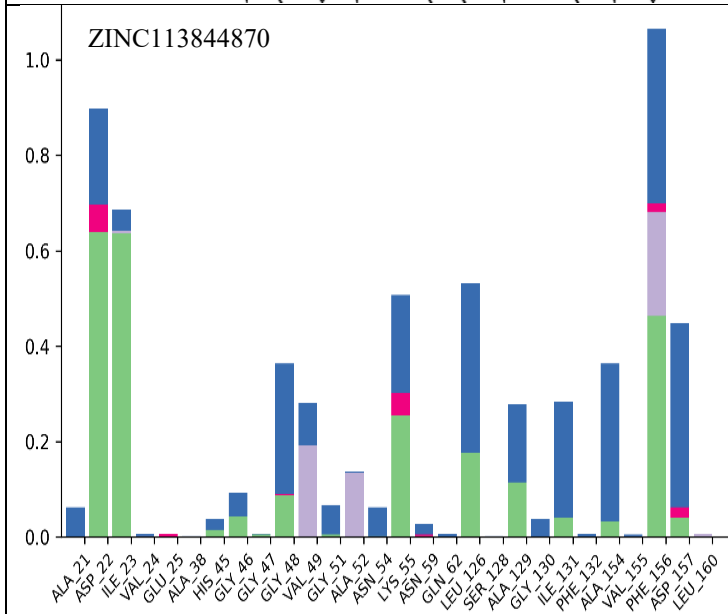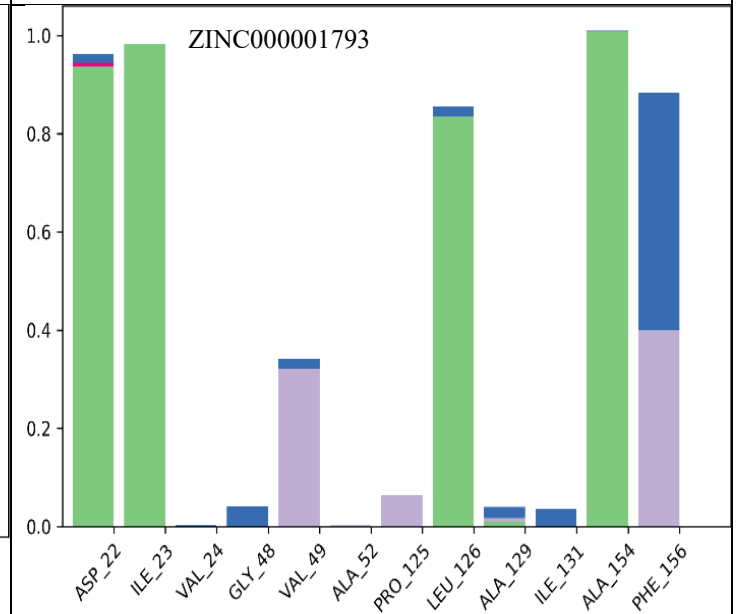

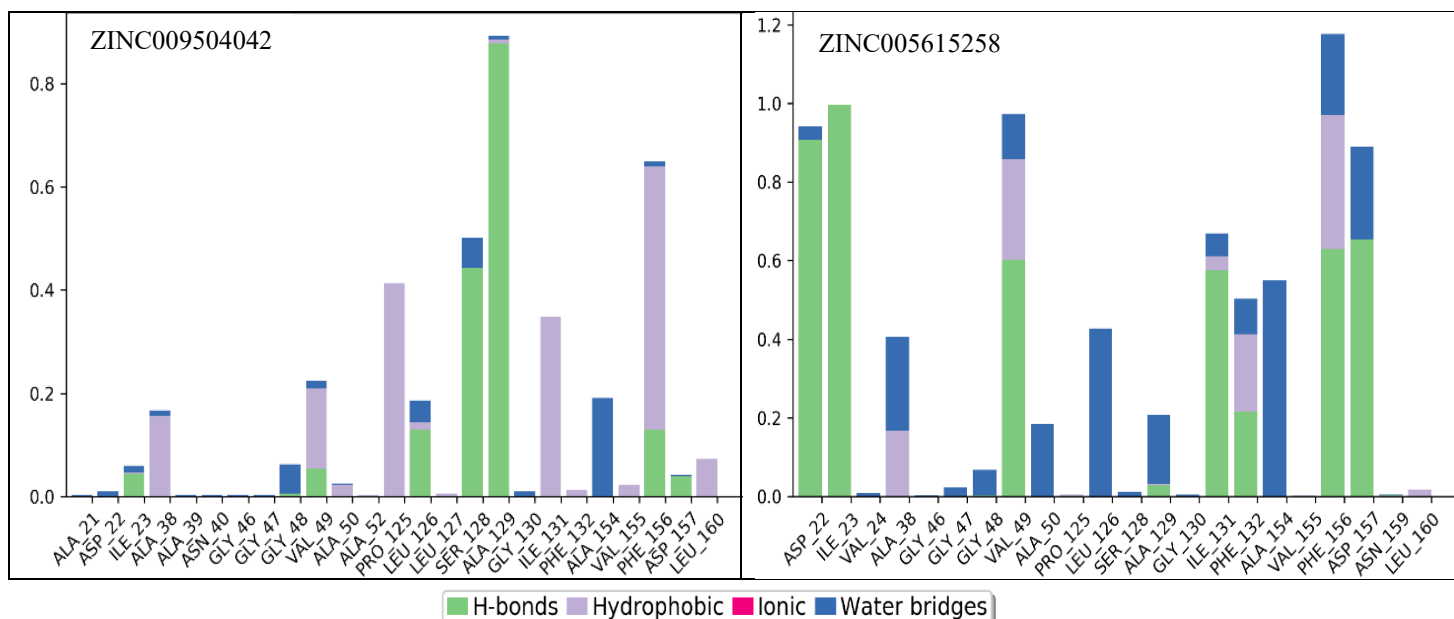

**Figure S5.** Protein-Ligand contacts during MD simulations for top eight compounds. Interaction fraction greater than 1 is possible because of multiple contacts on one residue.

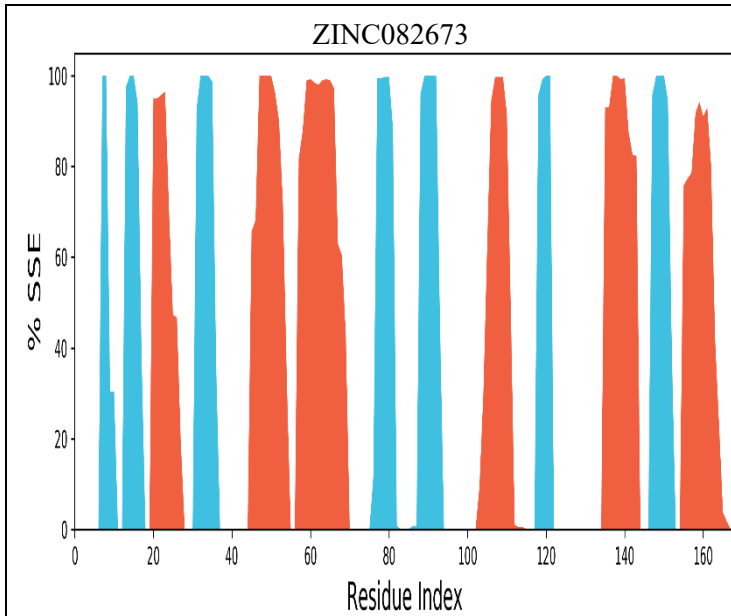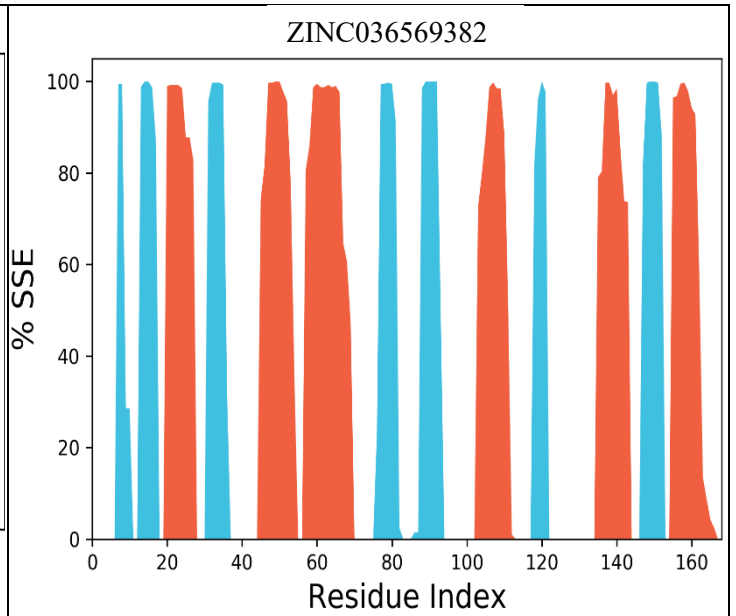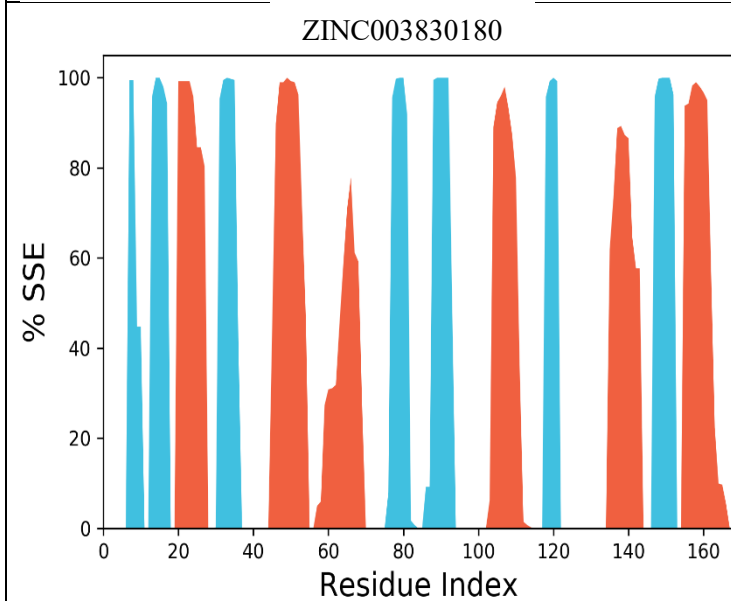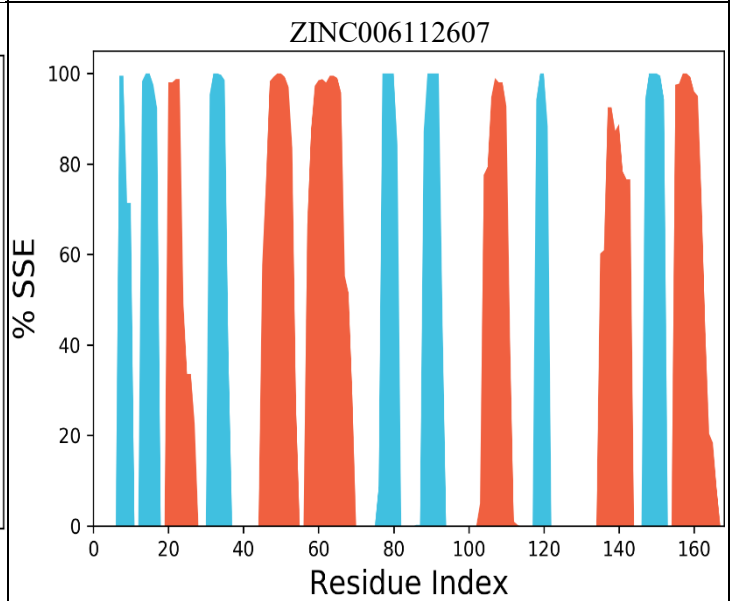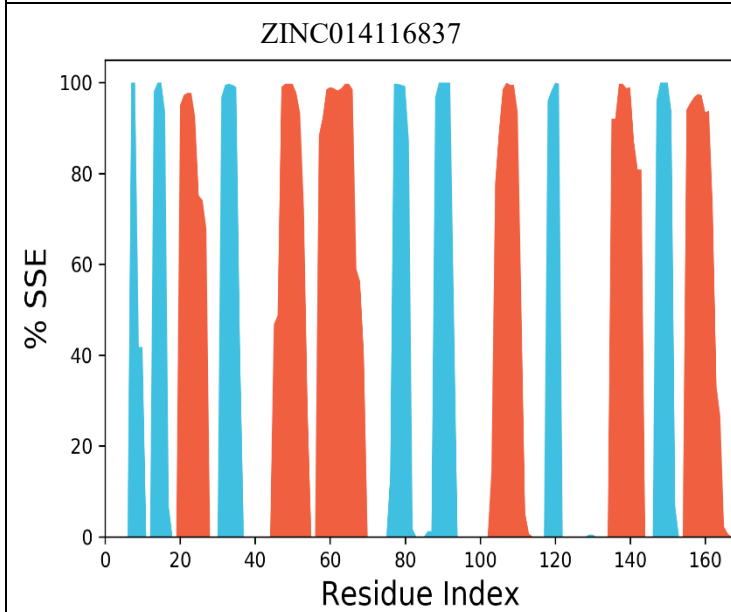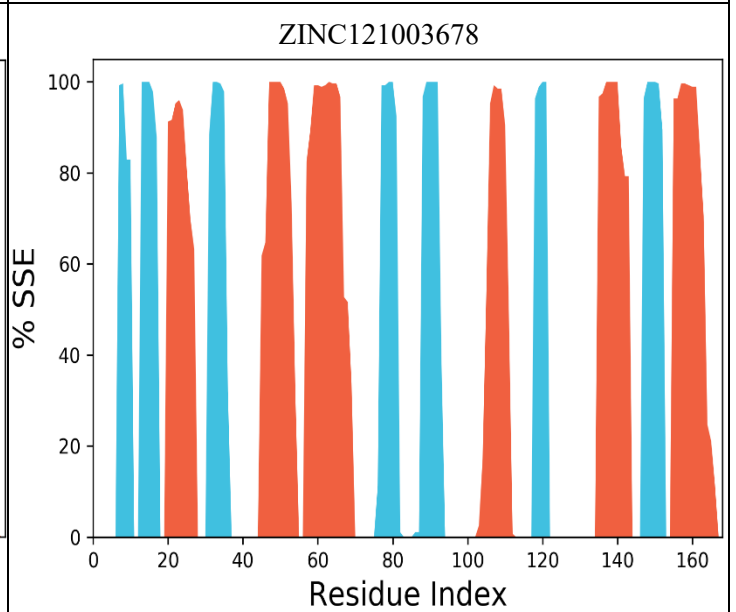



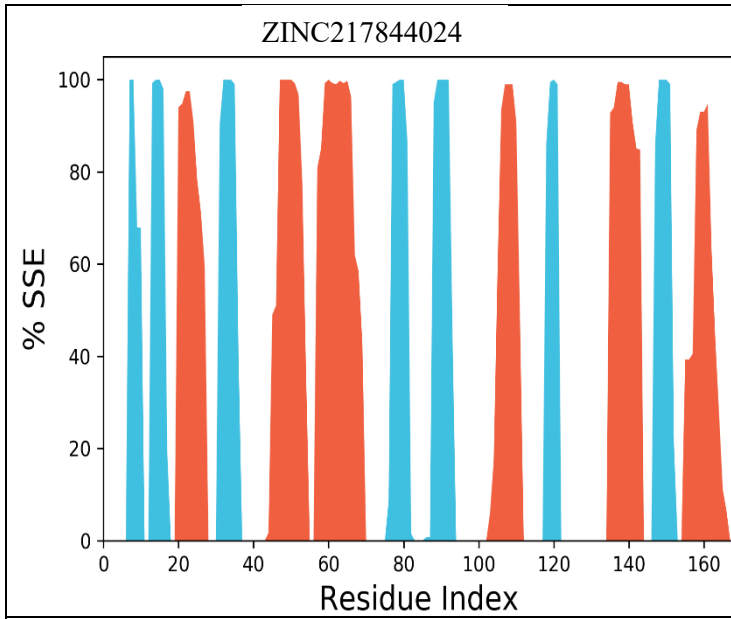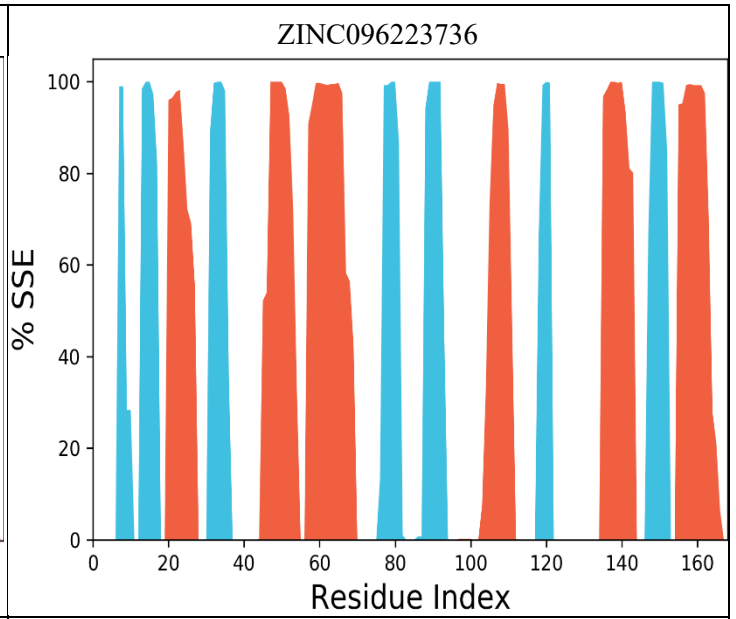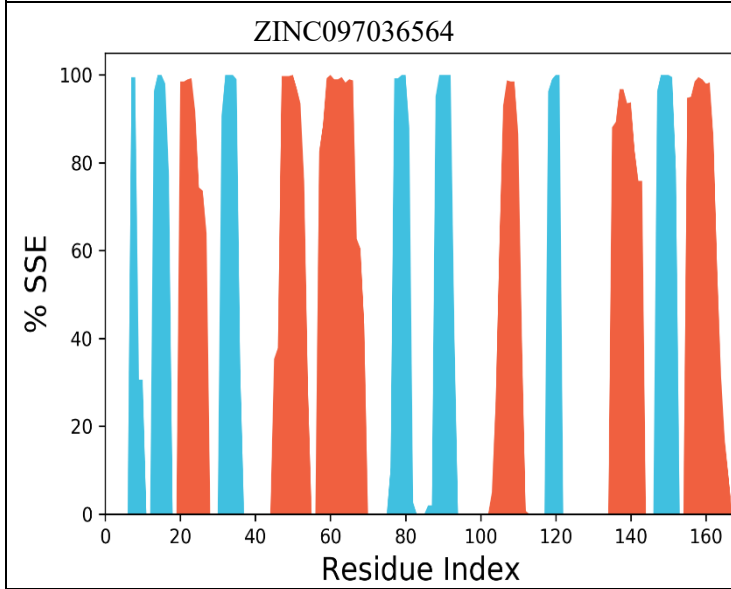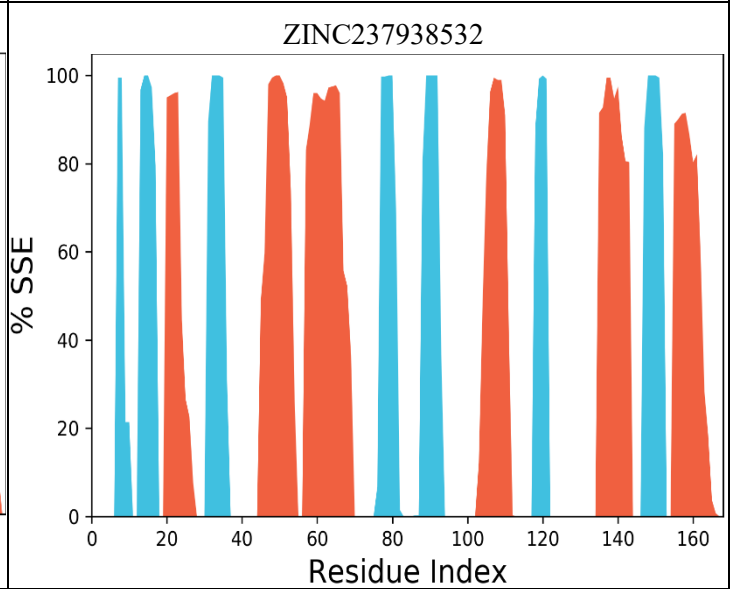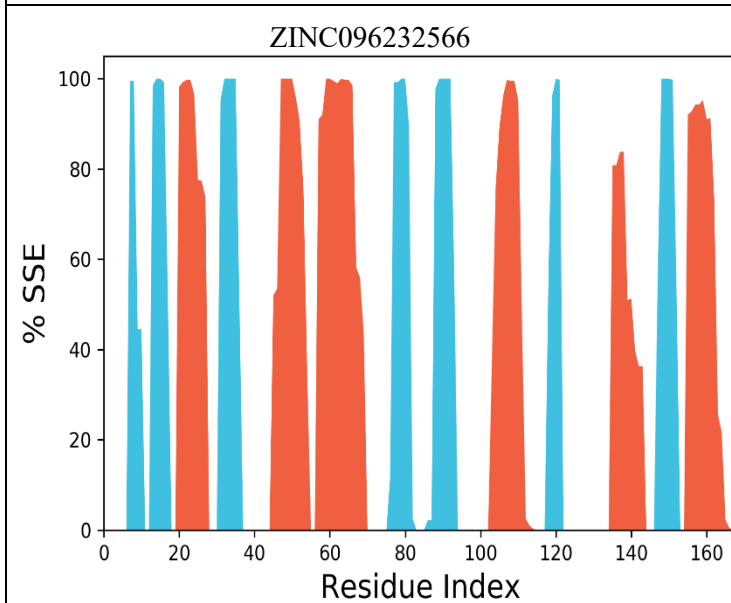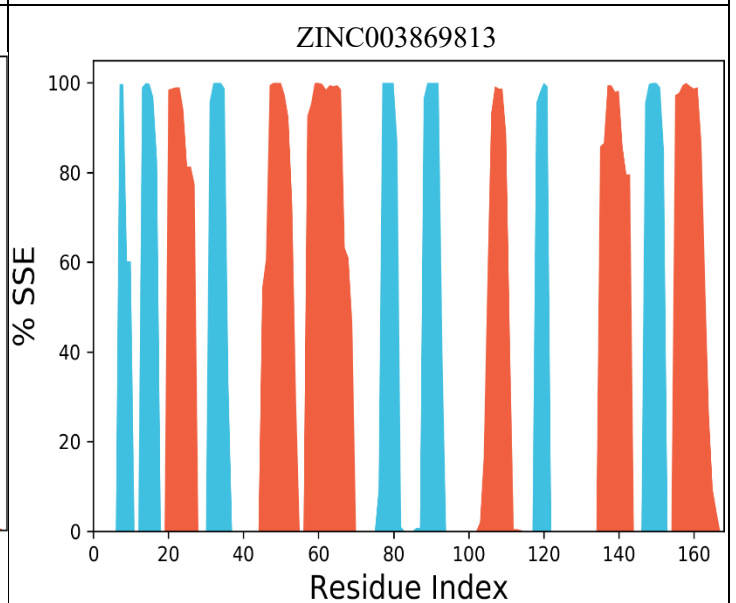

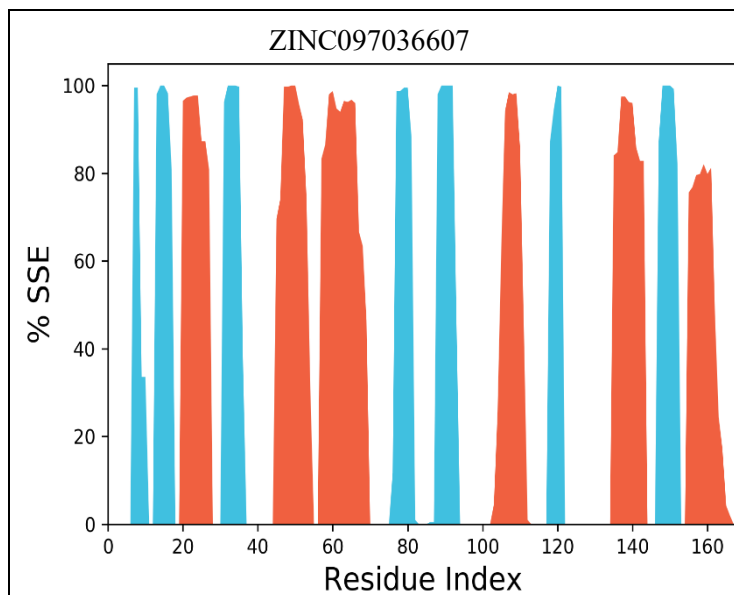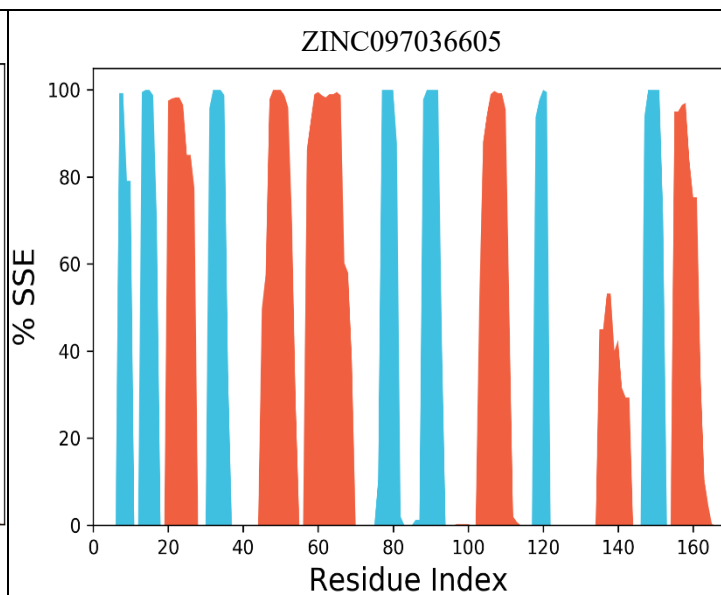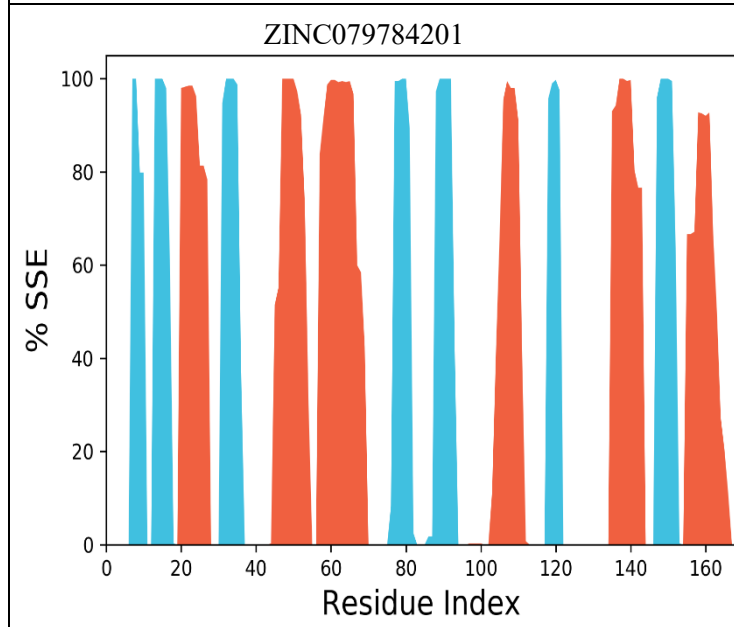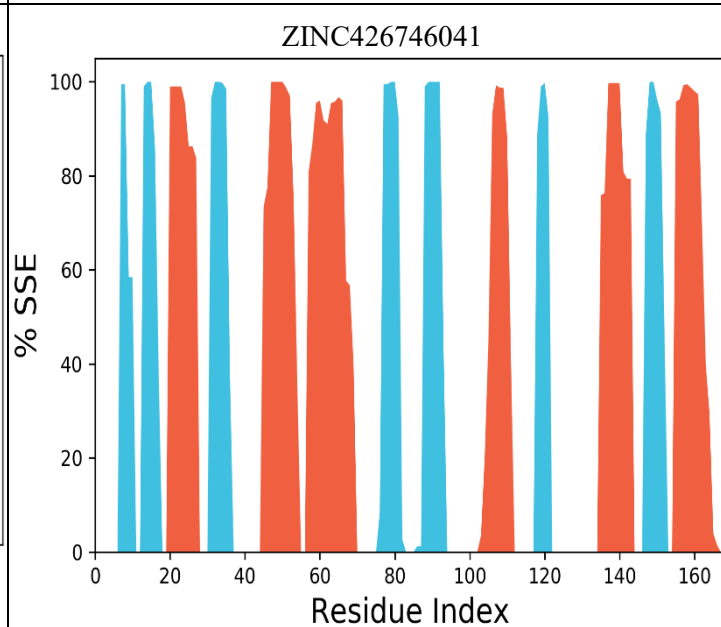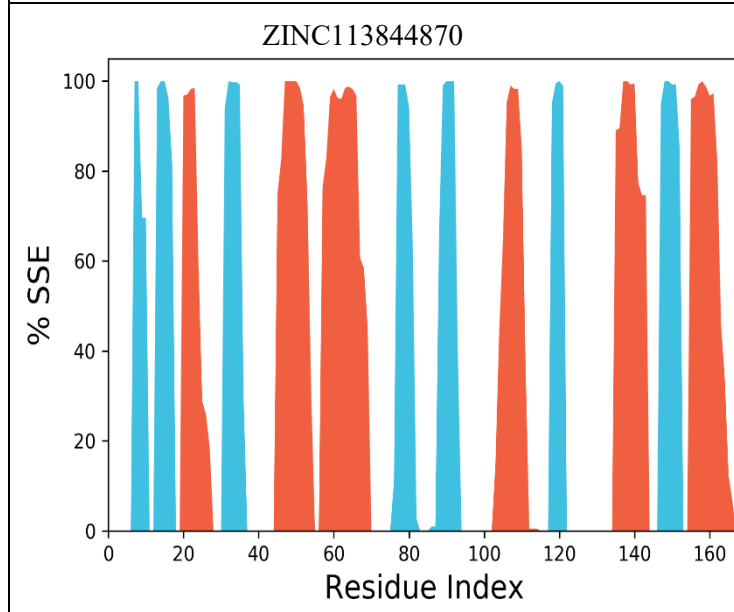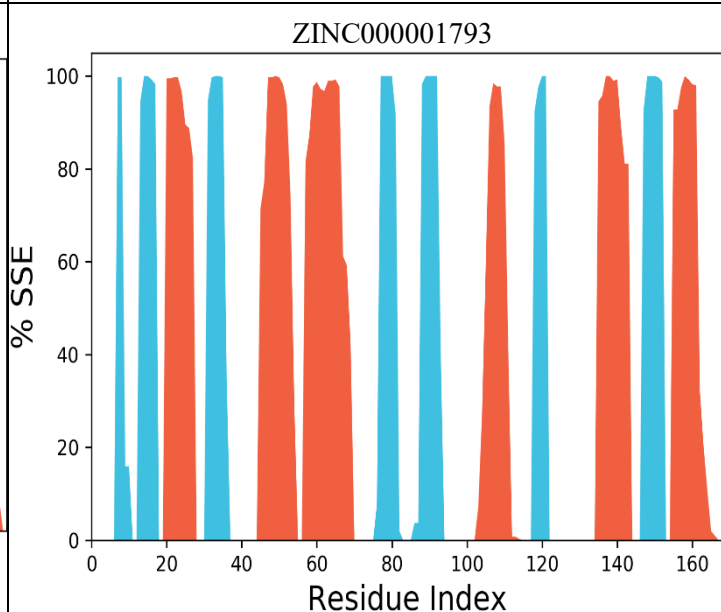

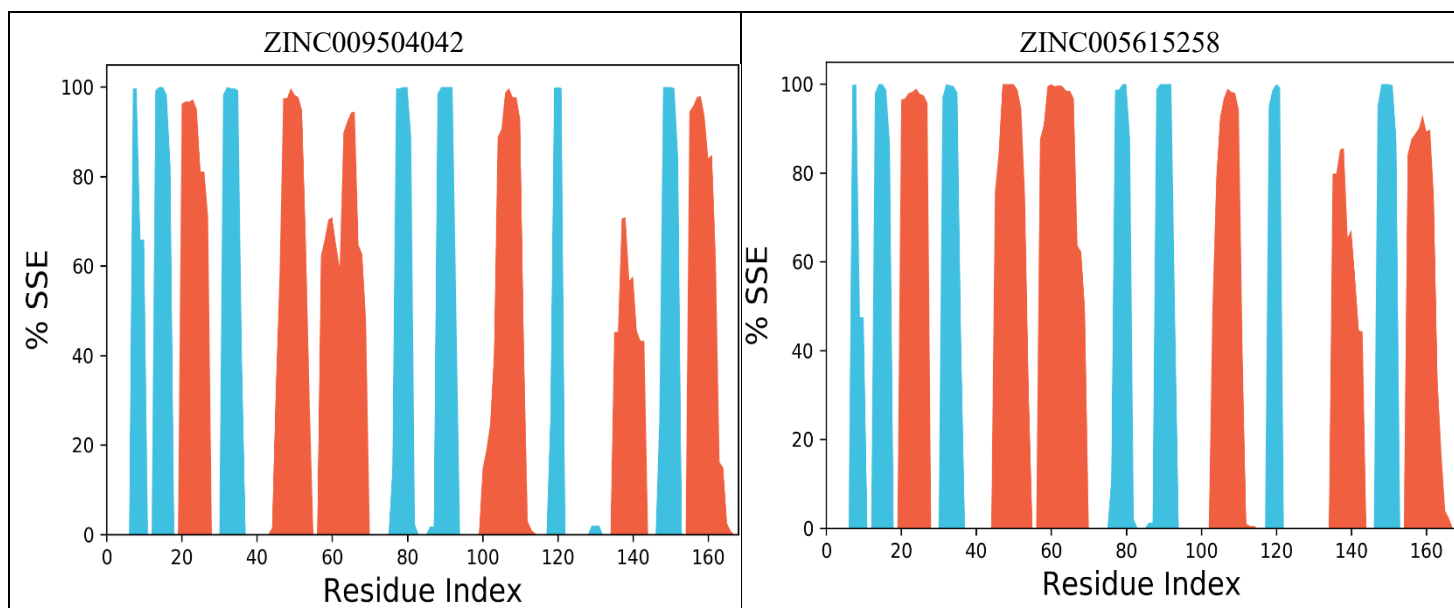

**Figure S6.** Protein Secondary Structure elements for the top twenty compounds. Red represents alpha helices and blue represents beta sheets and the white places represent random coil.

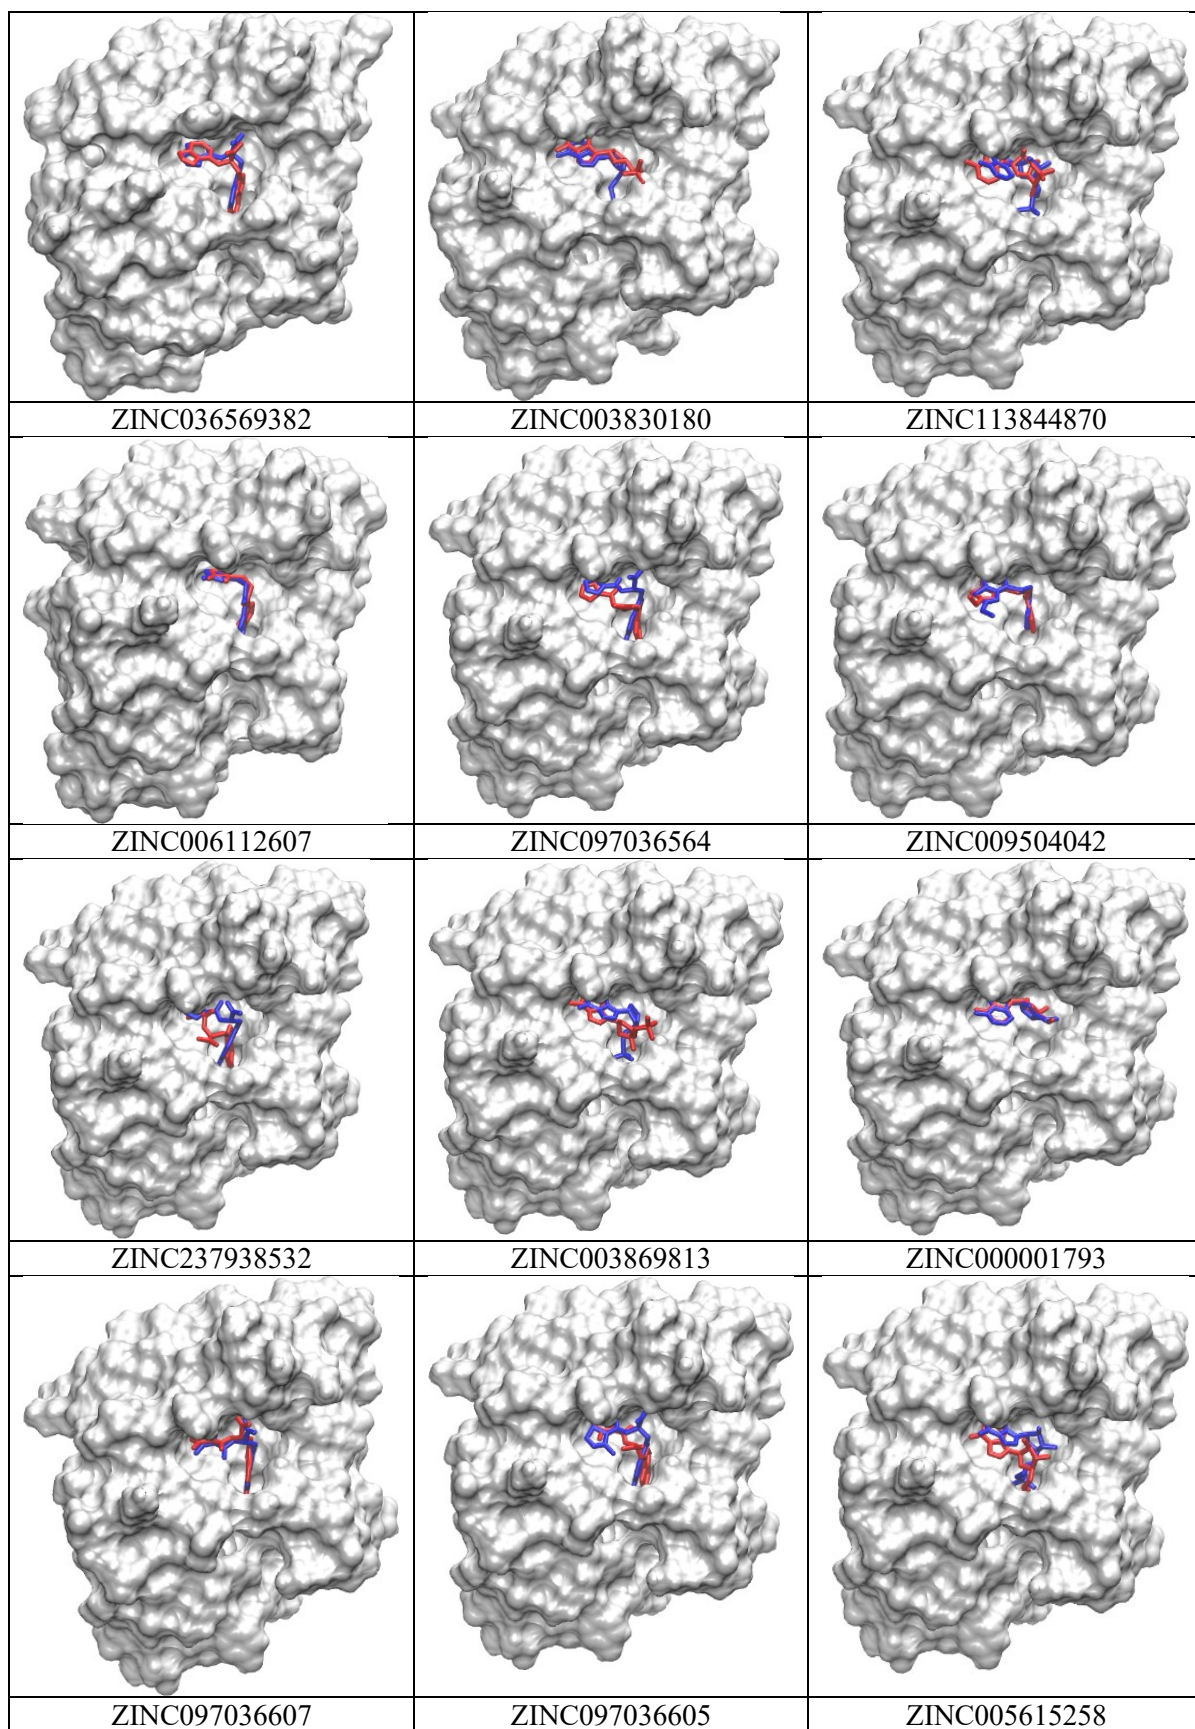

**Figure S7.** Comparison of ligand XP docking binding pose before (Red) and after (Blue) MD simulation for the twelve ligands.

|               |      |                                                                       |
|---------------|------|-----------------------------------------------------------------------|
| Ref. Compound | 6W6Y | [O-]P([O-])(=O)OC[C@@H]1[C@@H](O)[C@@H](O)[C@@H](O1n(cn2)c(c23)ncnc3N |
|---------------|------|-----------------------------------------------------------------------|

## Reference Molecule (6W6Y)

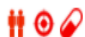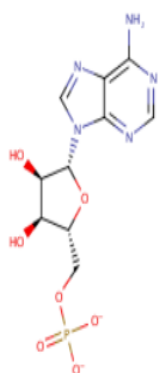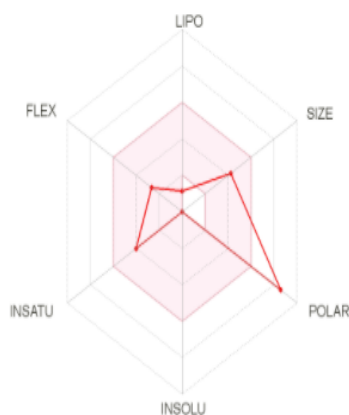

SMILES O[C@@H]1[C@H](O)[C@H](O[C@@H]1n1cnc2c1ncnc2N)COP(=O)([O-])[O-]

### Physicochemical Properties

|                        |                       |
|------------------------|-----------------------|
| Formula                | C10H12N5O7P           |
| Molecular weight       | 345.21 g/mol          |
| Num. heavy atoms       | 23                    |
| Num. arom. heavy atoms | 9                     |
| Fraction Csp3          | 0.50                  |
| Num. rotatable bonds   | 4                     |
| Num. H-bond acceptors  | 10                    |
| Num. H-bond donors     | 3                     |
| Molar Refractivity     | 70.52                 |
| TPSA <sup>?</sup>      | 201.54 Å <sup>2</sup> |

### Lipophilicity

|                                         |       |
|-----------------------------------------|-------|
| Log $P_{o/w}$ (iLOGP) <sup>?</sup>      | -0.59 |
| Log $P_{o/w}$ (XLOGP3) <sup>?</sup>     | -3.52 |
| Log $P_{o/w}$ (WLOGP) <sup>?</sup>      | -1.30 |
| Log $P_{o/w}$ (MLOGP) <sup>?</sup>      | -3.06 |
| Log $P_{o/w}$ (SILICOS-IT) <sup>?</sup> | -3.53 |
| Consensus Log $P_{o/w}$ <sup>?</sup>    | -2.40 |

### Water Solubility

|                                 |                                 |
|---------------------------------|---------------------------------|
| Log S (ESOL) <sup>?</sup>       | 0.21                            |
| Solubility                      | 5.62e+02 mg/ml ; 1.63e+00 mol/l |
| Class <sup>?</sup>              | Highly soluble                  |
| Log S (Ali) <sup>?</sup>        | -0.13                           |
| Solubility                      | 2.55e+02 mg/ml ; 7.40e-01 mol/l |
| Class <sup>?</sup>              | Very soluble                    |
| Log S (SILICOS-IT) <sup>?</sup> | 1.26                            |
| Solubility                      | 6.34e+03 mg/ml ; 1.84e+01 mol/l |
| Class <sup>?</sup>              | Soluble                         |

### Pharmacokinetics

|                                          |             |
|------------------------------------------|-------------|
| GI absorption <sup>?</sup>               | Low         |
| BBB permeant <sup>?</sup>                | No          |
| P-gp substrate <sup>?</sup>              | No          |
| CYP1A2 inhibitor <sup>?</sup>            | No          |
| CYP2C19 inhibitor <sup>?</sup>           | No          |
| CYP2C9 inhibitor <sup>?</sup>            | No          |
| CYP2D6 inhibitor <sup>?</sup>            | No          |
| CYP3A4 inhibitor <sup>?</sup>            | No          |
| Log $K_p$ (skin permeation) <sup>?</sup> | -10.90 cm/s |

### Druglikeness

|                                    |                                       |
|------------------------------------|---------------------------------------|
| Lipinski <sup>?</sup>              | Yes; 1 violation: NorO>10             |
| Ghose <sup>?</sup>                 | No; 1 violation: WLOGP<-0.4           |
| Veber <sup>?</sup>                 | No; 1 violation: TPSA>140             |
| Egan <sup>?</sup>                  | No; 1 violation: TPSA>131.6           |
| Muegge <sup>?</sup>                | No; 2 violations: XLOGP3<-2, TPSA>150 |
| Bioavailability Score <sup>?</sup> | 0.11                                  |

### Medicinal Chemistry

|                                      |                                |
|--------------------------------------|--------------------------------|
| PAINS <sup>?</sup>                   | 0 alert                        |
| Brenk <sup>?</sup>                   | 1 alert: phosphor <sup>?</sup> |
| Leadlikeness <sup>?</sup>            | Yes                            |
| Synthetic accessibility <sup>?</sup> | 4.28                           |

## 2-[(4-Azidosulfanylphenoxy)methyl]quinoline

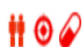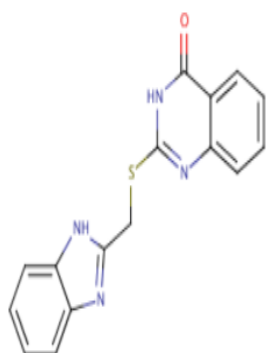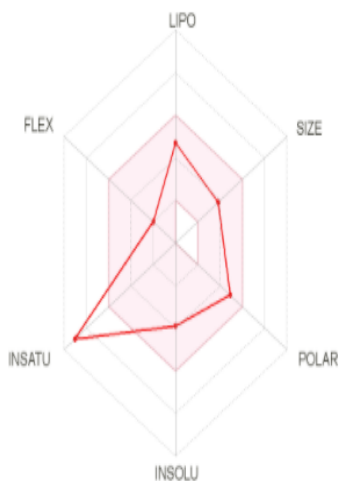

SMILES O=c1[nH]c(SCc2nc3c([nH]2)cccc3)nc2c1cccc2

## Physicochemical Properties

|                           |                                                               |
|---------------------------|---------------------------------------------------------------|
| Formula                   | C <sub>16</sub> H <sub>12</sub> N <sub>4</sub> O <sub>3</sub> |
| Molecular weight          | 308.36 g/mol                                                  |
| Num. heavy atoms          | 22                                                            |
| Num. arom. heavy atoms    | 19                                                            |
| Fraction Csp <sup>3</sup> | 0.06                                                          |
| Num. rotatable bonds      | 3                                                             |
| Num. H-bond acceptors     | 3                                                             |
| Num. H-bond donors        | 2                                                             |
| Molar Refractivity        | 88.22                                                         |
| TPSA <sup>?</sup>         | 99.73 Å <sup>2</sup>                                          |

## Lipophilicity

|                                                      |      |
|------------------------------------------------------|------|
| Log <i>P</i> <sub>ow</sub> (iLOGP) <sup>?</sup>      | 1.81 |
| Log <i>P</i> <sub>ow</sub> (XLOGP3) <sup>?</sup>     | 2.73 |
| Log <i>P</i> <sub>ow</sub> (WLOGP) <sup>?</sup>      | 2.94 |
| Log <i>P</i> <sub>ow</sub> (MLOGP) <sup>?</sup>      | 1.84 |
| Log <i>P</i> <sub>ow</sub> (SILICOS-IT) <sup>?</sup> | 4.00 |
| Consensus Log <i>P</i> <sub>ow</sub> <sup>?</sup>    | 2.66 |

## Water Solubility

|                                 |                                 |
|---------------------------------|---------------------------------|
| Log S (ESOL) <sup>?</sup>       | -3.91                           |
| Solubility                      | 3.77e-02 mg/ml ; 1.22e-04 mol/l |
| Class <sup>?</sup>              | Soluble                         |
| Log S (Ali) <sup>?</sup>        | -4.48                           |
| Solubility                      | 1.02e-02 mg/ml ; 3.32e-05 mol/l |
| Class <sup>?</sup>              | Moderately soluble              |
| Log S (SILICOS-IT) <sup>?</sup> | -6.77                           |
| Solubility                      | 5.27e-05 mg/ml ; 1.71e-07 mol/l |
| Class <sup>?</sup>              | Poorly soluble                  |

## Pharmacokinetics

|                                                          |            |
|----------------------------------------------------------|------------|
| GI absorption <sup>?</sup>                               | High       |
| BBB permeant <sup>?</sup>                                | No         |
| P-gp substrate <sup>?</sup>                              | No         |
| CYP1A2 inhibitor <sup>?</sup>                            | Yes        |
| CYP2C19 inhibitor <sup>?</sup>                           | No         |
| CYP2C9 inhibitor <sup>?</sup>                            | Yes        |
| CYP2D6 inhibitor <sup>?</sup>                            | Yes        |
| CYP3A4 inhibitor <sup>?</sup>                            | Yes        |
| Log <i>K</i> <sub>p</sub> (skin permeation) <sup>?</sup> | -6.24 cm/s |

## Druglikeness

|                                    |                  |
|------------------------------------|------------------|
| Lipinski <sup>?</sup>              | Yes; 0 violation |
| Ghose <sup>?</sup>                 | Yes              |
| Veber <sup>?</sup>                 | Yes              |
| Egan <sup>?</sup>                  | Yes              |
| Muegge <sup>?</sup>                | Yes              |
| Bioavailability Score <sup>?</sup> | 0.55             |

## Medicinal Chemistry

|                                      |         |
|--------------------------------------|---------|
| PAINS <sup>?</sup>                   | 0 alert |
| Brenk <sup>?</sup>                   | 0 alert |
| Leadlikeness <sup>?</sup>            | Yes     |
| Synthetic accessibility <sup>?</sup> | 2.63    |



## Molecule 1

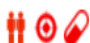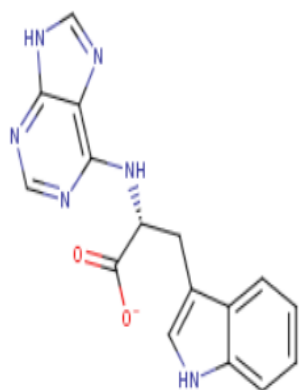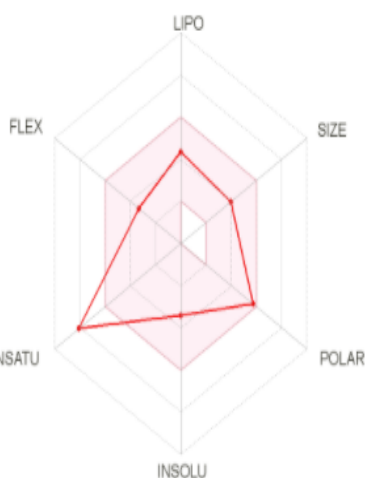

SMILES [O-]C(=O)[C@@H](Nc1ncnc2c1nc[nH]2)Cc1c[nH]c2c1cccc2

## Physicochemical Properties

|                           |                                                               |
|---------------------------|---------------------------------------------------------------|
| Formula                   | C <sub>16</sub> H <sub>13</sub> N <sub>6</sub> O <sub>2</sub> |
| Molecular weight          | 321.31 g/mol                                                  |
| Num. heavy atoms          | 24                                                            |
| Num. arom. heavy atoms    | 18                                                            |
| Fraction Csp <sup>3</sup> | 0.12                                                          |
| Num. rotatable bonds      | 5                                                             |
| Num. H-bond acceptors     | 5                                                             |
| Num. H-bond donors        | 3                                                             |
| Molar Refractivity        | 86.78                                                         |
| TPSA <sup>?</sup>         | 122.41 Å <sup>2</sup>                                         |

## Lipophilicity

|                                                       |       |
|-------------------------------------------------------|-------|
| Log <i>P</i> <sub>o/w</sub> (iLOGP) <sup>?</sup>      | 0.65  |
| Log <i>P</i> <sub>o/w</sub> (XLOGP3) <sup>?</sup>     | 2.13  |
| Log <i>P</i> <sub>o/w</sub> (WLOGP) <sup>?</sup>      | 0.42  |
| Log <i>P</i> <sub>o/w</sub> (MLOGP) <sup>?</sup>      | -1.52 |
| Log <i>P</i> <sub>o/w</sub> (SILICOS-IT) <sup>?</sup> | 2.00  |
| Consensus Log <i>P</i> <sub>o/w</sub> <sup>?</sup>    | 0.74  |

## Water Solubility

|                                 |                                 |
|---------------------------------|---------------------------------|
| Log S (ESOL) <sup>?</sup>       | -3.40                           |
| Solubility                      | 1.28e-01 mg/ml ; 3.99e-04 mol/l |
| Class <sup>?</sup>              | Soluble                         |
| Log S (Ali) <sup>?</sup>        | -4.33                           |
| Solubility                      | 1.50e-02 mg/ml ; 4.65e-05 mol/l |
| Class <sup>?</sup>              | Moderately soluble              |
| Log S (SILICOS-IT) <sup>?</sup> | -5.43                           |
| Solubility                      | 1.20e-03 mg/ml ; 3.75e-06 mol/l |
| Class <sup>?</sup>              | Moderately soluble              |

## Pharmacokinetics

|                                                          |            |
|----------------------------------------------------------|------------|
| GI absorption <sup>?</sup>                               | High       |
| BBB permeant <sup>?</sup>                                | No         |
| P-gp substrate <sup>?</sup>                              | No         |
| CYP1A2 inhibitor <sup>?</sup>                            | No         |
| CYP2C19 inhibitor <sup>?</sup>                           | No         |
| CYP2C9 inhibitor <sup>?</sup>                            | No         |
| CYP2D6 inhibitor <sup>?</sup>                            | No         |
| CYP3A4 inhibitor <sup>?</sup>                            | No         |
| Log <i>K</i> <sub>p</sub> (skin permeation) <sup>?</sup> | -6.75 cm/s |

## Druglikeness

|                                    |                  |
|------------------------------------|------------------|
| Lipinski <sup>?</sup>              | Yes; 0 violation |
| Ghose <sup>?</sup>                 | Yes              |
| Veber <sup>?</sup>                 | Yes              |
| Egan <sup>?</sup>                  | Yes              |
| Muegge <sup>?</sup>                | Yes              |
| Bioavailability Score <sup>?</sup> | 0.55             |

## Medicinal Chemistry

|                                      |         |
|--------------------------------------|---------|
| PAINS <sup>?</sup>                   | 0 alert |
| Brenk <sup>?</sup>                   | 0 alert |
| Leadlikeness <sup>?</sup>            | Yes     |
| Synthetic accessibility <sup>?</sup> | 2.94    |

3

ZINC000003830180

[O-]P([O-]  
) (=O)OC[C@H]1[C@@H](O)[C@@H](O)[C@H](O1)n(cn2)c(c23)ncnc3N

## Cyclic guanosine monophosphate

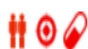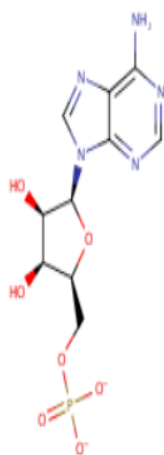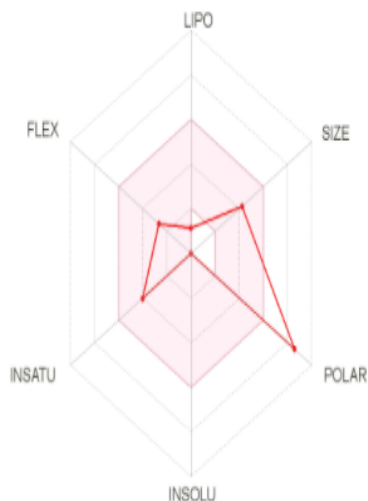

SMILES O[C@@H]1[C@H](O)[C@@H](O[C@@H]1n1cnc2c1ncnc2N)COP(=O)([O-])[O-]

## Physicochemical Properties

|                        |                       |
|------------------------|-----------------------|
| Formula                | C10H12N5O7P           |
| Molecular weight       | 345.21 g/mol          |
| Num. heavy atoms       | 23                    |
| Num. arom. heavy atoms | 9                     |
| Fraction Csp3          | 0.50                  |
| Num. rotatable bonds   | 4                     |
| Num. H-bond acceptors  | 10                    |
| Num. H-bond donors     | 3                     |
| Molar Refractivity     | 70.52                 |
| TPSA <sup>?</sup>      | 201.54 Å <sup>2</sup> |

## Lipophilicity

|                                        |       |
|----------------------------------------|-------|
| Log $P_{ow}$ (iLOGP) <sup>?</sup>      | -1.52 |
| Log $P_{ow}$ (XLOGP3) <sup>?</sup>     | -3.52 |
| Log $P_{ow}$ (WLOGP) <sup>?</sup>      | -1.30 |
| Log $P_{ow}$ (MLOGP) <sup>?</sup>      | -3.06 |
| Log $P_{ow}$ (SILICOS-IT) <sup>?</sup> | -3.53 |
| Consensus Log $P_{ow}$ <sup>?</sup>    | -2.59 |

## Water Solubility

|                                 |                                 |
|---------------------------------|---------------------------------|
| Log S (ESOL) <sup>?</sup>       | 0.21                            |
| Solubility                      | 5.62e+02 mg/ml ; 1.63e+00 mol/l |
| Class <sup>?</sup>              | Highly soluble                  |
| Log S (Ali) <sup>?</sup>        | -0.13                           |
| Solubility                      | 2.55e+02 mg/ml ; 7.40e-01 mol/l |
| Class <sup>?</sup>              | Very soluble                    |
| Log S (SILICOS-IT) <sup>?</sup> | 1.26                            |
| Solubility                      | 6.34e+03 mg/ml ; 1.84e+01 mol/l |
| Class <sup>?</sup>              | Soluble                         |

## Pharmacokinetics

|                                          |             |
|------------------------------------------|-------------|
| GI absorption <sup>?</sup>               | Low         |
| BBB permeant <sup>?</sup>                | No          |
| P-gp substrate <sup>?</sup>              | No          |
| CYP1A2 inhibitor <sup>?</sup>            | No          |
| CYP2C19 inhibitor <sup>?</sup>           | No          |
| CYP2C9 inhibitor <sup>?</sup>            | No          |
| CYP2D6 inhibitor <sup>?</sup>            | No          |
| CYP3A4 inhibitor <sup>?</sup>            | No          |
| Log $K_p$ (skin permeation) <sup>?</sup> | -10.90 cm/s |

## Druglikeness

|                                    |                                       |
|------------------------------------|---------------------------------------|
| Lipinski <sup>?</sup>              | Yes; 1 violation: NorO>10             |
| Ghose <sup>?</sup>                 | No; 1 violation: WLOGP<-0.4           |
| Weber <sup>?</sup>                 | No; 1 violation: TPSA>140             |
| Egan <sup>?</sup>                  | No; 1 violation: TPSA>131.6           |
| Muegge <sup>?</sup>                | No; 2 violations: XLOGP3<-2, TPSA>150 |
| Bioavailability Score <sup>?</sup> | 0.11                                  |

## Medicinal Chemistry

|                                      |                                |
|--------------------------------------|--------------------------------|
| PAINS <sup>?</sup>                   | 0 alert                        |
| Brenk <sup>?</sup>                   | 1 alert: phosphor <sup>?</sup> |
| Leadlikeness <sup>?</sup>            | Yes                            |
| Synthetic accessibility <sup>?</sup> | 4.28                           |



## Molecule 1

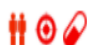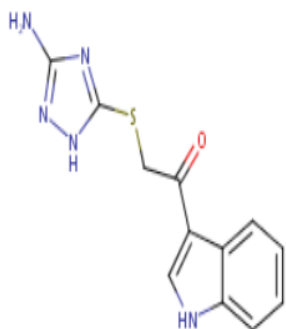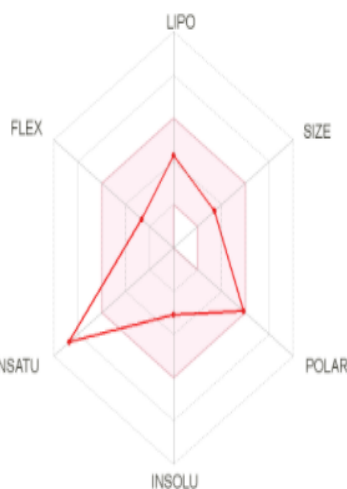

SMILES Nc1nc([nH]n1)SCC(=O)c2c[nH]c(c23)cccc3

## Physicochemical Properties

|                        |                       |
|------------------------|-----------------------|
| Formula                | C12H11N5OS            |
| Molecular weight       | 273.31 g/mol          |
| Num. heavy atoms       | 19                    |
| Num. arom. heavy atoms | 14                    |
| Fraction Csp3          | 0.08                  |
| Num. rotatable bonds   | 4                     |
| Num. H-bond acceptors  | 3                     |
| Num. H-bond donors     | 3                     |
| Molar Refractivity     | 74.08                 |
| TPSA <sup>?</sup>      | 125.75 Å <sup>2</sup> |

## Lipophilicity

|                                         |      |
|-----------------------------------------|------|
| Log $P_{o/w}$ (iLOGP) <sup>?</sup>      | 0.76 |
| Log $P_{o/w}$ (XLOGP3) <sup>?</sup>     | 2.02 |
| Log $P_{o/w}$ (WLOGP) <sup>?</sup>      | 1.85 |
| Log $P_{o/w}$ (MLOGP) <sup>?</sup>      | 0.34 |
| Log $P_{o/w}$ (SILICOS-IT) <sup>?</sup> | 2.13 |
| Consensus Log $P_{o/w}$ <sup>?</sup>    | 1.42 |

## Water Solubility

|                                 |                                 |
|---------------------------------|---------------------------------|
| Log S (ESOL) <sup>?</sup>       | -3.09                           |
| Solubility                      | 2.23e-01 mg/ml ; 8.16e-04 mol/l |
| Class <sup>?</sup>              | Soluble                         |
| Log S (Ali) <sup>?</sup>        | -4.29                           |
| Solubility                      | 1.41e-02 mg/ml ; 5.15e-05 mol/l |
| Class <sup>?</sup>              | Moderately soluble              |
| Log S (SILICOS-IT) <sup>?</sup> | -4.37                           |
| Solubility                      | 1.16e-02 mg/ml ; 4.26e-05 mol/l |
| Class <sup>?</sup>              | Moderately soluble              |

## Pharmacokinetics

|                                          |            |
|------------------------------------------|------------|
| GI absorption <sup>?</sup>               | High       |
| BBB permeant <sup>?</sup>                | No         |
| P-gp substrate <sup>?</sup>              | No         |
| CYP1A2 inhibitor <sup>?</sup>            | Yes        |
| CYP2C19 inhibitor <sup>?</sup>           | No         |
| CYP2C9 inhibitor <sup>?</sup>            | No         |
| CYP2D6 inhibitor <sup>?</sup>            | No         |
| CYP3A4 inhibitor <sup>?</sup>            | No         |
| Log $K_p$ (skin permeation) <sup>?</sup> | -6.53 cm/s |

## Druglikeness

|                                    |                  |
|------------------------------------|------------------|
| Lipinski <sup>?</sup>              | Yes; 0 violation |
| Ghose <sup>?</sup>                 | Yes              |
| Veber <sup>?</sup>                 | Yes              |
| Egan <sup>?</sup>                  | Yes              |
| Muegge <sup>?</sup>                | Yes              |
| Bioavailability Score <sup>?</sup> | 0.55             |

## Medicinal Chemistry

|                                      |         |
|--------------------------------------|---------|
| PAINS <sup>?</sup>                   | 0 alert |
| Brenk <sup>?</sup>                   | 0 alert |
| Leadlikeness <sup>?</sup>            | Yes     |
| Synthetic accessibility <sup>?</sup> | 2.48    |

## Molecule 1

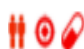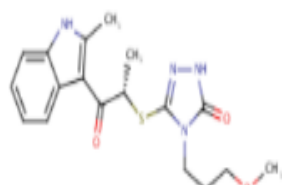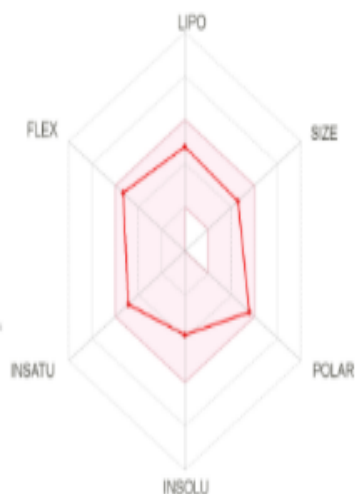

SMILES COCCn1c(n[nH]c1=O)S[C@H](C(=O)c1c(C)[nH]c2c1cccc2)C

## Physicochemical Properties

|                           |                                                                 |
|---------------------------|-----------------------------------------------------------------|
| Formula                   | C <sub>18</sub> H <sub>22</sub> N <sub>4</sub> O <sub>3</sub> S |
| Molecular weight          | 374.46 g/mol                                                    |
| Num. heavy atoms          | 26                                                              |
| Num. arom. heavy atoms    | 14                                                              |
| Fraction Csp <sup>3</sup> | 0.39                                                            |
| Num. rotatable bonds      | 8                                                               |
| Num. H-bond acceptors     | 4                                                               |
| Num. H-bond donors        | 2                                                               |
| Molar Refractivity        | 102.68                                                          |
| TPSA <sup>①</sup>         | 118.07 Å <sup>2</sup>                                           |

## Lipophilicity

|                                                      |      |
|------------------------------------------------------|------|
| Log <i>P</i> <sub>OW</sub> (ILOGP) <sup>①</sup>      | 2.37 |
| Log <i>P</i> <sub>OW</sub> (XLOGP3) <sup>①</sup>     | 2.87 |
| Log <i>P</i> <sub>OW</sub> (WLOGP) <sup>①</sup>      | 2.76 |
| Log <i>P</i> <sub>OW</sub> (MLOGP) <sup>①</sup>      | 1.54 |
| Log <i>P</i> <sub>OW</sub> (SILICOS-IT) <sup>①</sup> | 3.84 |
| Consensus Log <i>P</i> <sub>OW</sub> <sup>①</sup>    | 2.67 |

## Water Solubility

|                                 |                                 |
|---------------------------------|---------------------------------|
| Log S (ESOL) <sup>①</sup>       | -3.84                           |
| Solubility                      | 5.41e-02 mg/ml ; 1.44e-04 mol/l |
| Class <sup>①</sup>              | Soluble                         |
| Log S (All) <sup>①</sup>        | -5.01                           |
| Solubility                      | 3.67e-03 mg/ml ; 9.80e-06 mol/l |
| Class <sup>①</sup>              | Moderately soluble              |
| Log S (SILICOS-IT) <sup>①</sup> | -5.51                           |
| Solubility                      | 1.14e-03 mg/ml ; 3.05e-06 mol/l |
| Class <sup>①</sup>              | Moderately soluble              |

## Pharmacokinetics

|                                                          |            |
|----------------------------------------------------------|------------|
| GI absorption <sup>①</sup>                               | High       |
| BBB permeant <sup>①</sup>                                | No         |
| P-gp substrate <sup>①</sup>                              | No         |
| CYP1A2 inhibitor <sup>①</sup>                            | No         |
| CYP2C19 inhibitor <sup>①</sup>                           | Yes        |
| CYP2C9 inhibitor <sup>①</sup>                            | Yes        |
| CYP2D6 inhibitor <sup>①</sup>                            | No         |
| CYP3A4 inhibitor <sup>①</sup>                            | Yes        |
| Log <i>K</i> <sub>p</sub> (skin permeation) <sup>①</sup> | -6.55 cm/s |

## Druglikeness

|                                    |                  |
|------------------------------------|------------------|
| Lipinski <sup>①</sup>              | Yes; 0 violation |
| Ghose <sup>①</sup>                 | Yes              |
| Veber <sup>①</sup>                 | Yes              |
| Egan <sup>①</sup>                  | Yes              |
| Muegge <sup>①</sup>                | Yes              |
| Bioavailability Score <sup>①</sup> | 0.55             |

## Medicinal Chemistry

|                                      |                                    |
|--------------------------------------|------------------------------------|
| PAINS <sup>①</sup>                   | 0 alert                            |
| Brenk <sup>①</sup>                   | 0 alert                            |
| Leadlikeness <sup>①</sup>            | No; 2 violations: MW>350, Rotors>7 |
| Synthetic accessibility <sup>①</sup> | 3.69                               |

## Molecule 1

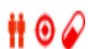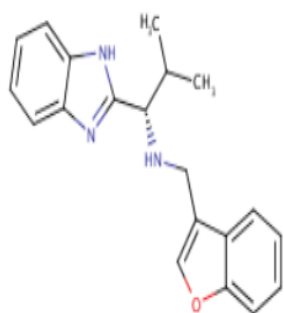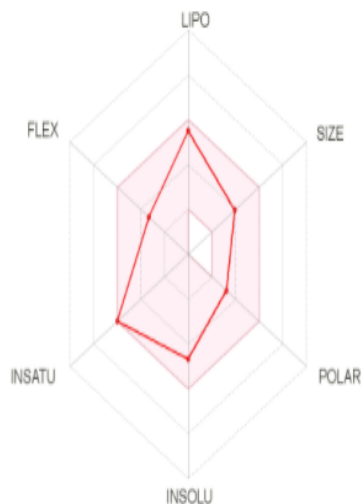

SMILES CC([C@H](c1nc2c([nH]1)cccc2)NCc1coc2c1cccc2)C

## Physicochemical Properties

|                           |                                                  |
|---------------------------|--------------------------------------------------|
| Formula                   | C <sub>20</sub> H <sub>21</sub> N <sub>3</sub> O |
| Molecular weight          | 319.40 g/mol                                     |
| Num. heavy atoms          | 24                                               |
| Num. arom. heavy atoms    | 18                                               |
| Fraction Csp <sup>3</sup> | 0.25                                             |
| Num. rotatable bonds      | 5                                                |
| Num. H-bond acceptors     | 3                                                |
| Num. H-bond donors        | 2                                                |
| Molar Refractivity        | 97.35                                            |
| TPSA <sup>?</sup>         | 53.85 Å <sup>2</sup>                             |

## Lipophilicity

|                                                      |      |
|------------------------------------------------------|------|
| Log <i>P</i> <sub>ow</sub> (iLOGP) <sup>?</sup>      | 2.99 |
| Log <i>P</i> <sub>ow</sub> (XLOGP3) <sup>?</sup>     | 4.15 |
| Log <i>P</i> <sub>ow</sub> (WLOGP) <sup>?</sup>      | 4.32 |
| Log <i>P</i> <sub>ow</sub> (MLOGP) <sup>?</sup>      | 2.64 |
| Log <i>P</i> <sub>ow</sub> (SILICOS-IT) <sup>?</sup> | 4.65 |
| Consensus Log <i>P</i> <sub>ow</sub> <sup>?</sup>    | 3.75 |

## Water Solubility

|                                 |                                 |
|---------------------------------|---------------------------------|
| Log S (ESOL) <sup>?</sup>       | -4.66                           |
| Solubility                      | 6.99e-03 mg/ml ; 2.19e-05 mol/l |
| Class <sup>?</sup>              | Moderately soluble              |
| Log S (Alii) <sup>?</sup>       | -4.99                           |
| Solubility                      | 3.28e-03 mg/ml ; 1.03e-05 mol/l |
| Class <sup>?</sup>              | Moderately soluble              |
| Log S (SILICOS-IT) <sup>?</sup> | -7.62                           |
| Solubility                      | 7.59e-06 mg/ml ; 2.38e-08 mol/l |
| Class <sup>?</sup>              | Poorly soluble                  |

## Pharmacokinetics

|                                                          |            |
|----------------------------------------------------------|------------|
| GI absorption <sup>?</sup>                               | High       |
| BBB permeant <sup>?</sup>                                | Yes        |
| P-gp substrate <sup>?</sup>                              | Yes        |
| CYP1A2 inhibitor <sup>?</sup>                            | Yes        |
| CYP2C19 inhibitor <sup>?</sup>                           | Yes        |
| CYP2C9 inhibitor <sup>?</sup>                            | Yes        |
| CYP2D6 inhibitor <sup>?</sup>                            | Yes        |
| CYP3A4 inhibitor <sup>?</sup>                            | Yes        |
| Log <i>K</i> <sub>p</sub> (skin permeation) <sup>?</sup> | -5.30 cm/s |

## Druglikeness

|                                    |                  |
|------------------------------------|------------------|
| Lipinski <sup>?</sup>              | Yes; 0 violation |
| Ghose <sup>?</sup>                 | Yes              |
| Veber <sup>?</sup>                 | Yes              |
| Egan <sup>?</sup>                  | Yes              |
| Muegge <sup>?</sup>                | Yes              |
| Bioavailability Score <sup>?</sup> | 0.55             |

## Medicinal Chemistry

|                                      |                             |
|--------------------------------------|-----------------------------|
| PAINS <sup>?</sup>                   | 0 alert                     |
| Brenk <sup>?</sup>                   | 0 alert                     |
| Leadlikeness <sup>?</sup>            | No; 1 violation: XLOGP3>3.5 |
| Synthetic accessibility <sup>?</sup> | 3.40                        |

## Molecule 1

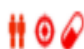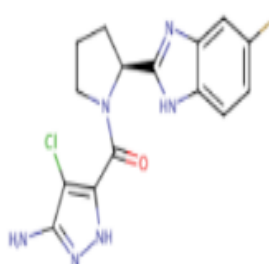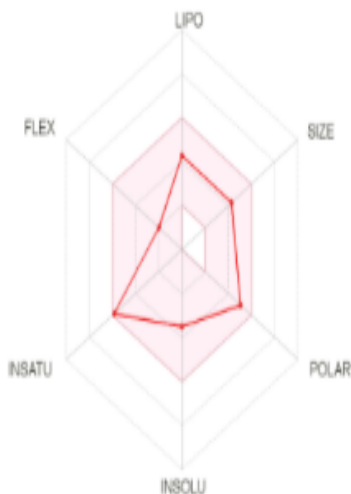

SMILES Fc1ccc2c(c1)nc([nH]2)[C@@H]1CCCN1C(=O)c1[nH]nc(c1Cl)N

## Physicochemical Properties

|                           |                                                     |
|---------------------------|-----------------------------------------------------|
| Formula                   | C <sub>15</sub> H <sub>14</sub> ClFN <sub>6</sub> O |
| Molecular weight          | 348.76 g/mol                                        |
| Num. heavy atoms          | 24                                                  |
| Num. arom. heavy atoms    | 14                                                  |
| Fraction Csp <sup>3</sup> | 0.27                                                |
| Num. rotatable bonds      | 3                                                   |
| Num. H-bond acceptors     | 4                                                   |
| Num. H-bond donors        | 3                                                   |
| Molar Refractivity        | 91.41                                               |
| TPSA <sup>①</sup>         | 103.69 Å <sup>2</sup>                               |

## Lipophilicity

|                                                      |      |
|------------------------------------------------------|------|
| Log <i>P</i> <sub>ow</sub> (ILOGP) <sup>①</sup>      | 1.50 |
| Log <i>P</i> <sub>ow</sub> (XLOGP3) <sup>①</sup>     | 2.01 |
| Log <i>P</i> <sub>ow</sub> (WLOGP) <sup>①</sup>      | 2.36 |
| Log <i>P</i> <sub>ow</sub> (MLOGP) <sup>①</sup>      | 1.92 |
| Log <i>P</i> <sub>ow</sub> (SILICOS-IT) <sup>①</sup> | 2.60 |
| Consensus Log <i>P</i> <sub>ow</sub> <sup>①</sup>    | 2.08 |

## Water Solubility

|                                 |                                 |
|---------------------------------|---------------------------------|
| Log S (ESOL) <sup>①</sup>       | -3.50                           |
| Solubility                      | 1.10e-01 mg/ml ; 3.15e-04 mol/l |
| Class <sup>①</sup>              | Soluble                         |
| Log S (All) <sup>①</sup>        | -3.81                           |
| Solubility                      | 5.35e-02 mg/ml ; 1.53e-04 mol/l |
| Class <sup>①</sup>              | Soluble                         |
| Log S (SILICOS-IT) <sup>①</sup> | -4.93                           |
| Solubility                      | 4.12e-03 mg/ml ; 1.18e-05 mol/l |
| Class <sup>①</sup>              | Moderately soluble              |

## Pharmacokinetics

|                                                          |            |
|----------------------------------------------------------|------------|
| GI absorption <sup>①</sup>                               | High       |
| BBB permeant <sup>①</sup>                                | No         |
| P-gp substrate <sup>①</sup>                              | Yes        |
| CYP1A2 inhibitor <sup>①</sup>                            | Yes        |
| CYP2C19 inhibitor <sup>①</sup>                           | No         |
| CYP2C9 inhibitor <sup>①</sup>                            | No         |
| CYP2D6 inhibitor <sup>①</sup>                            | No         |
| CYP3A4 inhibitor <sup>①</sup>                            | No         |
| Log <i>K</i> <sub>p</sub> (skin permeation) <sup>①</sup> | -7.00 cm/s |

## Druglikeness

|                                    |                  |
|------------------------------------|------------------|
| Lipinski <sup>①</sup>              | Yes; 0 violation |
| Ghose <sup>①</sup>                 | Yes              |
| Veber <sup>①</sup>                 | Yes              |
| Egan <sup>①</sup>                  | Yes              |
| Muegge <sup>①</sup>                | Yes              |
| Bioavailability Score <sup>①</sup> | 0.55             |

## Medicinal Chemistry

|                                      |         |
|--------------------------------------|---------|
| PAINS <sup>①</sup>                   | 0 alert |
| Brenk <sup>①</sup>                   | 0 alert |
| Leadlikeness <sup>①</sup>            | Yes     |
| Synthetic accessibility <sup>①</sup> | 3.12    |

## Molecule 1

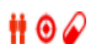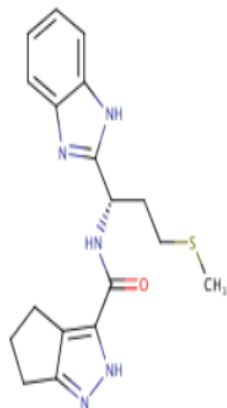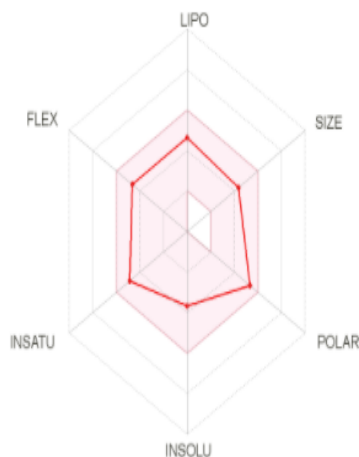

SMILES CSCC[C@@H](c1nc2c([nH]1)cccc2)NC(=O)c1[nH]nc2c1CCC2

## Physicochemical Properties

|                        |                       |
|------------------------|-----------------------|
| Formula                | C18H21N5OS            |
| Molecular weight       | 355.46 g/mol          |
| Num. heavy atoms       | 25                    |
| Num. arom. heavy atoms | 14                    |
| Fraction Csp3          | 0.39                  |
| Num. rotatable bonds   | 7                     |
| Num. H-bond acceptors  | 3                     |
| Num. H-bond donors     | 3                     |
| Molar Refractivity     | 100.36                |
| TPSA <sup>?</sup>      | 111.76 Å <sup>2</sup> |

## Lipophilicity

|                                         |      |
|-----------------------------------------|------|
| Log $P_{o/w}$ (iLOGP) <sup>?</sup>      | 1.80 |
| Log $P_{o/w}$ (XLOGP3) <sup>?</sup>     | 2.65 |
| Log $P_{o/w}$ (WLOGP) <sup>?</sup>      | 2.67 |
| Log $P_{o/w}$ (MLOGP) <sup>?</sup>      | 1.87 |
| Log $P_{o/w}$ (SILICOS-IT) <sup>?</sup> | 4.13 |
| Consensus Log $P_{o/w}$ <sup>?</sup>    | 2.62 |

## Water Solubility

|                                 |                                 |
|---------------------------------|---------------------------------|
| Log S (ESOL) <sup>?</sup>       | -3.67                           |
| Solubility                      | 7.67e-02 mg/ml ; 2.16e-04 mol/l |
| Class <sup>?</sup>              | Soluble                         |
| Log S (Alii) <sup>?</sup>       | -4.65                           |
| Solubility                      | 7.99e-03 mg/ml ; 2.25e-05 mol/l |
| Class <sup>?</sup>              | Moderately soluble              |
| Log S (SILICOS-IT) <sup>?</sup> | -6.41                           |
| Solubility                      | 1.39e-04 mg/ml ; 3.90e-07 mol/l |
| Class <sup>?</sup>              | Poorly soluble                  |

## Pharmacokinetics

|                                          |            |
|------------------------------------------|------------|
| GI absorption <sup>?</sup>               | High       |
| BBB permeant <sup>?</sup>                | No         |
| P-gp substrate <sup>?</sup>              | Yes        |
| CYP1A2 inhibitor <sup>?</sup>            | Yes        |
| CYP2C19 inhibitor <sup>?</sup>           | Yes        |
| CYP2C9 inhibitor <sup>?</sup>            | Yes        |
| CYP2D6 inhibitor <sup>?</sup>            | Yes        |
| CYP3A4 inhibitor <sup>?</sup>            | Yes        |
| Log $K_p$ (skin permeation) <sup>?</sup> | -6.59 cm/s |

## Druglikeness

|                                    |                  |
|------------------------------------|------------------|
| Lipinski <sup>?</sup>              | Yes; 0 violation |
| Ghose <sup>?</sup>                 | Yes              |
| Veber <sup>?</sup>                 | Yes              |
| Egan <sup>?</sup>                  | Yes              |
| Muegge <sup>?</sup>                | Yes              |
| Bioavailability Score <sup>?</sup> | 0.55             |

## Medicinal Chemistry

|                                      |                         |
|--------------------------------------|-------------------------|
| PAINS <sup>?</sup>                   | 0 alert                 |
| Brenk <sup>?</sup>                   | 0 alert                 |
| Leadlikeness <sup>?</sup>            | No; 1 violation: MW>350 |
| Synthetic accessibility <sup>?</sup> | 3.52                    |

## Molecule 1

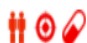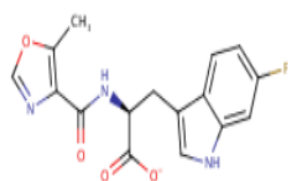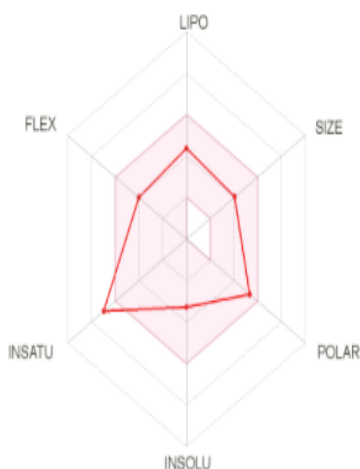

SMILES [O-]C(=O)[C@H](Cc1c[nH]c2c1ccc(c2)F)NC(=O)c1ncc1C

## Physicochemical Properties

|                        |                       |
|------------------------|-----------------------|
| Formula                | C16H13FN3O4           |
| Molecular weight       | 330.29 g/mol          |
| Num. heavy atoms       | 24                    |
| Num. arom. heavy atoms | 14                    |
| Fraction Csp3          | 0.19                  |
| Num. rotatable bonds   | 6                     |
| Num. H-bond acceptors  | 6                     |
| Num. H-bond donors     | 2                     |
| Molar Refractivity     | 80.21                 |
| TPSA <sup>?</sup>      | 111.05 Å <sup>2</sup> |

## Lipophilicity

|                                        |      |
|----------------------------------------|------|
| Log $P_{ow}$ (iLOGP) <sup>?</sup>      | 1.83 |
| Log $P_{ow}$ (XLOGP3) <sup>?</sup>     | 2.16 |
| Log $P_{ow}$ (WLOGP) <sup>?</sup>      | 1.11 |
| Log $P_{ow}$ (MLOGP) <sup>?</sup>      | 0.63 |
| Log $P_{ow}$ (SILICOS-IT) <sup>?</sup> | 2.81 |
| Consensus Log $P_{ow}$ <sup>?</sup>    | 1.71 |

## Water Solubility

|                                 |                                 |
|---------------------------------|---------------------------------|
| Log S (ESOL) <sup>?</sup>       | -3.28                           |
| Solubility                      | 1.72e-01 mg/ml ; 5.20e-04 mol/l |
| Class <sup>?</sup>              | Soluble                         |
| Log S (Alii) <sup>?</sup>       | -4.12                           |
| Solubility                      | 2.48e-02 mg/ml ; 7.50e-05 mol/l |
| Class <sup>?</sup>              | Moderately soluble              |
| Log S (SILICOS-IT) <sup>?</sup> | -5.11                           |
| Solubility                      | 2.57e-03 mg/ml ; 7.78e-06 mol/l |
| Class <sup>?</sup>              | Moderately soluble              |

## Pharmacokinetics

|                                          |            |
|------------------------------------------|------------|
| GI absorption <sup>?</sup>               | High       |
| BBB permeant <sup>?</sup>                | No         |
| P-gp substrate <sup>?</sup>              | No         |
| CYP1A2 inhibitor <sup>?</sup>            | Yes        |
| CYP2C19 inhibitor <sup>?</sup>           | No         |
| CYP2C9 inhibitor <sup>?</sup>            | No         |
| CYP2D6 inhibitor <sup>?</sup>            | No         |
| CYP3A4 inhibitor <sup>?</sup>            | No         |
| Log $K_p$ (skin permeation) <sup>?</sup> | -6.78 cm/s |

## Druglikeness

|                                    |                  |
|------------------------------------|------------------|
| Lipinski <sup>?</sup>              | Yes; 0 violation |
| Ghose <sup>?</sup>                 | Yes              |
| Veber <sup>?</sup>                 | Yes              |
| Egan <sup>?</sup>                  | Yes              |
| Muegge <sup>?</sup>                | Yes              |
| Bioavailability Score <sup>?</sup> | 0.56             |

## Medicinal Chemistry

|                                      |         |
|--------------------------------------|---------|
| PAINS <sup>?</sup>                   | 0 alert |
| Brenk <sup>?</sup>                   | 0 alert |
| Leadlikeness <sup>?</sup>            | Yes     |
| Synthetic accessibility <sup>?</sup> | 3.09    |

## Molecule 1

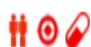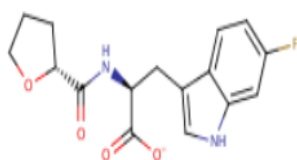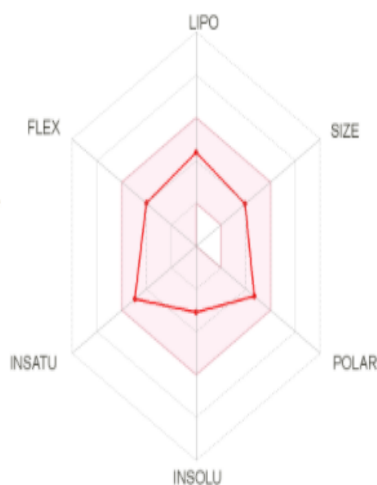

SMILES [O-]C(=O)[C@H](Cc1c[nH]c2c1ccc(c2)F)NC(=O)[C@H]1CCCO1

## Physicochemical Properties

|                           |                                                                |
|---------------------------|----------------------------------------------------------------|
| Formula                   | C <sub>16</sub> H <sub>16</sub> FN <sub>2</sub> O <sub>4</sub> |
| Molecular weight          | 319.31 g/mol                                                   |
| Num. heavy atoms          | 23                                                             |
| Num. arom. heavy atoms    | 9                                                              |
| Fraction Csp <sup>3</sup> | 0.38                                                           |
| Num. rotatable bonds      | 6                                                              |
| Num. H-bond acceptors     | 5                                                              |
| Num. H-bond donors        | 2                                                              |
| Molar Refractivity        | 78.67                                                          |
| TPSA <sup>?</sup>         | 94.25 Å <sup>2</sup>                                           |

## Lipophilicity

|                                                       |      |
|-------------------------------------------------------|------|
| Log <i>P</i> <sub>o/w</sub> (iLOGP) <sup>?</sup>      | 0.91 |
| Log <i>P</i> <sub>o/w</sub> (XLOGP3) <sup>?</sup>     | 2.16 |
| Log <i>P</i> <sub>o/w</sub> (WLOGP) <sup>?</sup>      | 0.68 |
| Log <i>P</i> <sub>o/w</sub> (MLOGP) <sup>?</sup>      | 0.95 |
| Log <i>P</i> <sub>o/w</sub> (SILICOS-IT) <sup>?</sup> | 2.69 |
| Consensus Log <i>P</i> <sub>o/w</sub> <sup>?</sup>    | 1.48 |

## Water Solubility

|                                 |                                 |
|---------------------------------|---------------------------------|
| Log S (ESOL) <sup>?</sup>       | -3.07                           |
| Solubility                      | 2.69e-01 mg/ml ; 8.43e-04 mol/l |
| Class <sup>?</sup>              | Soluble                         |
| Log S (Ali) <sup>?</sup>        | -3.77                           |
| Solubility                      | 5.40e-02 mg/ml ; 1.69e-04 mol/l |
| Class <sup>?</sup>              | Soluble                         |
| Log S (SILICOS-IT) <sup>?</sup> | -3.99                           |
| Solubility                      | 3.28e-02 mg/ml ; 1.03e-04 mol/l |
| Class <sup>?</sup>              | Soluble                         |

## Pharmacokinetics

|                                                          |            |
|----------------------------------------------------------|------------|
| GI absorption <sup>?</sup>                               | High       |
| BBB permeant <sup>?</sup>                                | No         |
| P-gp substrate <sup>?</sup>                              | No         |
| CYP1A2 inhibitor <sup>?</sup>                            | No         |
| CYP2C19 inhibitor <sup>?</sup>                           | No         |
| CYP2C9 inhibitor <sup>?</sup>                            | No         |
| CYP2D6 inhibitor <sup>?</sup>                            | No         |
| CYP3A4 inhibitor <sup>?</sup>                            | No         |
| Log <i>K</i> <sub>p</sub> (skin permeation) <sup>?</sup> | -6.71 cm/s |

## Druglikeness

|                                    |                  |
|------------------------------------|------------------|
| Lipinski <sup>?</sup>              | Yes; 0 violation |
| Ghose <sup>?</sup>                 | Yes              |
| Weber <sup>?</sup>                 | Yes              |
| Egan <sup>?</sup>                  | Yes              |
| Muegge <sup>?</sup>                | Yes              |
| Bioavailability Score <sup>?</sup> | 0.56             |

## Medicinal Chemistry

|                                      |         |
|--------------------------------------|---------|
| PAINS <sup>?</sup>                   | 0 alert |
| Brenk <sup>?</sup>                   | 0 alert |
| Leadlikeness <sup>?</sup>            | Yes     |
| Synthetic accessibility <sup>?</sup> | 3.14    |

## Molecule 1

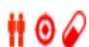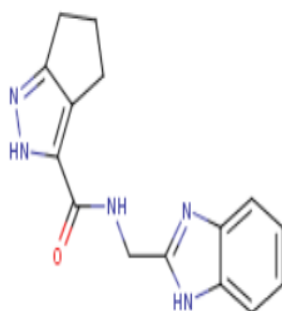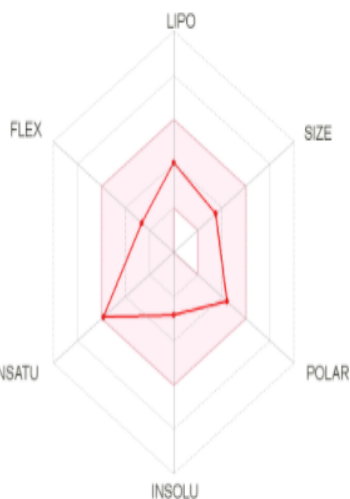

SMILES O=C(c1[nH]nc2c1CCC2)NCc1nc2c([nH]1)cccc2

## Physicochemical Properties

|                        |                      |
|------------------------|----------------------|
| Formula                | C15H15N5O            |
| Molecular weight       | 281.31 g/mol         |
| Num. heavy atoms       | 21                   |
| Num. arom. heavy atoms | 14                   |
| Fraction Csp3          | 0.27                 |
| Num. rotatable bonds   | 4                    |
| Num. H-bond acceptors  | 3                    |
| Num. H-bond donors     | 3                    |
| Molar Refractivity     | 78.35                |
| TPSA <sup>?</sup>      | 86.46 Å <sup>2</sup> |

## Lipophilicity

|                                         |      |
|-----------------------------------------|------|
| Log $P_{o/w}$ (iLOGP) <sup>?</sup>      | 1.24 |
| Log $P_{o/w}$ (XLOGP3) <sup>?</sup>     | 1.61 |
| Log $P_{o/w}$ (WLOGP) <sup>?</sup>      | 1.55 |
| Log $P_{o/w}$ (MLOGP) <sup>?</sup>      | 1.14 |
| Log $P_{o/w}$ (SILICOS-IT) <sup>?</sup> | 3.09 |
| Consensus Log $P_{o/w}$ <sup>?</sup>    | 1.73 |

## Water Solubility

|                                 |                                 |
|---------------------------------|---------------------------------|
| Log S (ESOL) <sup>?</sup>       | -2.83                           |
| Solubility                      | 4.18e-01 mg/ml ; 1.49e-03 mol/l |
| Class <sup>?</sup>              | Soluble                         |
| Log S (Ali) <sup>?</sup>        | -3.04                           |
| Solubility                      | 2.58e-01 mg/ml ; 9.17e-04 mol/l |
| Class <sup>?</sup>              | Soluble                         |
| Log S (SILICOS-IT) <sup>?</sup> | -5.50                           |
| Solubility                      | 8.94e-04 mg/ml ; 3.18e-06 mol/l |
| Class <sup>?</sup>              | Moderately soluble              |

## Pharmacokinetics

|                                          |            |
|------------------------------------------|------------|
| GI absorption <sup>?</sup>               | High       |
| BBB permeant <sup>?</sup>                | No         |
| P-gp substrate <sup>?</sup>              | Yes        |
| CYP1A2 inhibitor <sup>?</sup>            | Yes        |
| CYP2C19 inhibitor <sup>?</sup>           | No         |
| CYP2C9 inhibitor <sup>?</sup>            | No         |
| CYP2D6 inhibitor <sup>?</sup>            | Yes        |
| CYP3A4 inhibitor <sup>?</sup>            | Yes        |
| Log $K_p$ (skin permeation) <sup>?</sup> | -6.87 cm/s |

## Druglikeness

|                                    |                  |
|------------------------------------|------------------|
| Lipinski <sup>?</sup>              | Yes; 0 violation |
| Ghose <sup>?</sup>                 | Yes              |
| Veber <sup>?</sup>                 | Yes              |
| Egan <sup>?</sup>                  | Yes              |
| Muegge <sup>?</sup>                | Yes              |
| Bioavailability Score <sup>?</sup> | 0.55             |

## Medicinal Chemistry

|                                      |         |
|--------------------------------------|---------|
| PAINS <sup>?</sup>                   | 0 alert |
| Brenk <sup>?</sup>                   | 0 alert |
| Leadlikeness <sup>?</sup>            | Yes     |
| Synthetic accessibility <sup>?</sup> | 2.61    |



## Cyclic adenosine monophosphate

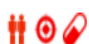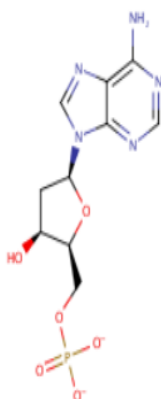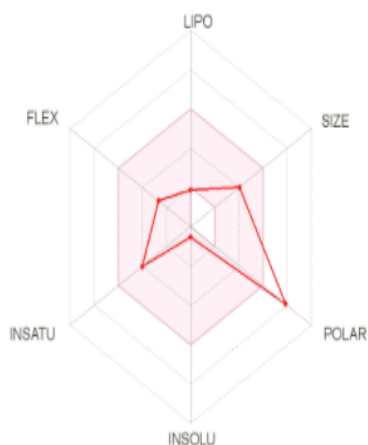

SMILES O[C@H]1C[C@H](O[C@H]1COP(=O)([O-])[O-])n1cnc2c1ncnc2N

### Physicochemical Properties

|                        |              |
|------------------------|--------------|
| Formula                | C10H12N5O6P  |
| Molecular weight       | 329.21 g/mol |
| Num. heavy atoms       | 22           |
| Num. arom. heavy atoms | 9            |
| Fraction Csp3          | 0.50         |
| Num. rotatable bonds   | 4            |
| Num. H-bond acceptors  | 9            |
| Num. H-bond donors     | 2            |
| Molar Refractivity     | 69.36        |
| TPSA <sup>?</sup>      | 181.31 Å²    |

### Lipophilicity

|                                         |       |
|-----------------------------------------|-------|
| Log $P_{o/w}$ (iLOGP) <sup>?</sup>      | -0.16 |
| Log $P_{o/w}$ (XLOGP3) <sup>?</sup>     | -2.20 |
| Log $P_{o/w}$ (WLOGP) <sup>?</sup>      | -0.27 |
| Log $P_{o/w}$ (MLOGP) <sup>?</sup>      | -2.31 |
| Log $P_{o/w}$ (SILICOS-IT) <sup>?</sup> | -2.66 |
| Consensus Log $P_{o/w}$ <sup>?</sup>    | -1.52 |

### Water Solubility

|                                 |                                 |
|---------------------------------|---------------------------------|
| Log S (ESOL) <sup>?</sup>       | -0.53                           |
| Solubility                      | 9.63e+01 mg/ml ; 2.93e-01 mol/l |
| Class <sup>?</sup>              | Very soluble                    |
| Log S (Ali) <sup>?</sup>        | -1.08                           |
| Solubility                      | 2.77e+01 mg/ml ; 8.40e-02 mol/l |
| Class <sup>?</sup>              | Very soluble                    |
| Log S (SILICOS-IT) <sup>?</sup> | 0.45                            |
| Solubility                      | 9.26e+02 mg/ml ; 2.81e+00 mol/l |
| Class <sup>?</sup>              | Soluble                         |

### Pharmacokinetics

|                                          |            |
|------------------------------------------|------------|
| GI absorption <sup>?</sup>               | Low        |
| BBB permeant <sup>?</sup>                | No         |
| P-gp substrate <sup>?</sup>              | No         |
| CYP1A2 inhibitor <sup>?</sup>            | No         |
| CYP2C19 inhibitor <sup>?</sup>           | No         |
| CYP2C9 inhibitor <sup>?</sup>            | No         |
| CYP2D6 inhibitor <sup>?</sup>            | No         |
| CYP3A4 inhibitor <sup>?</sup>            | No         |
| Log $K_p$ (skin permeation) <sup>?</sup> | -9.87 cm/s |

### Druglikeness

|                                    |                                       |
|------------------------------------|---------------------------------------|
| Lipinski <sup>?</sup>              | Yes; 1 violation: NorO>10             |
| Ghose <sup>?</sup>                 | Yes                                   |
| Veber <sup>?</sup>                 | No; 1 violation: TPSA>140             |
| Egan <sup>?</sup>                  | No; 1 violation: TPSA>131.6           |
| Muegge <sup>?</sup>                | No; 2 violations: XLOGP3<-2, TPSA>150 |
| Bioavailability Score <sup>?</sup> | 0.11                                  |

### Medicinal Chemistry

|                                      |                                |
|--------------------------------------|--------------------------------|
| PAINS <sup>?</sup>                   | 0 alert                        |
| Brenk <sup>?</sup>                   | 1 alert: phosphor <sup>?</sup> |
| Leadlikeness <sup>?</sup>            | Yes                            |
| Synthetic accessibility <sup>?</sup> | 4.04                           |

## Molecule 1

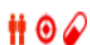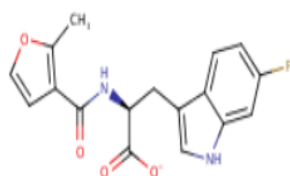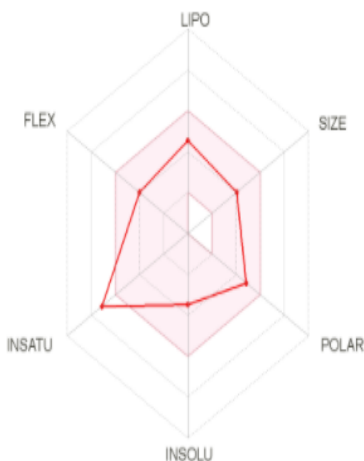

SMILES [O-]C(=O)[C@H](Cc1c[nH]c2c1ccc(c2)F)NC(=O)c1ccc1C

## Physicochemical Properties

|                        |                      |
|------------------------|----------------------|
| Formula                | C17H14FN2O4          |
| Molecular weight       | 329.30 g/mol         |
| Num. heavy atoms       | 24                   |
| Num. arom. heavy atoms | 14                   |
| Fraction Csp3          | 0.18                 |
| Num. rotatable bonds   | 6                    |
| Num. H-bond acceptors  | 5                    |
| Num. H-bond donors     | 2                    |
| Molar Refractivity     | 82.42                |
| TPSA <sup>?</sup>      | 98.16 Å <sup>2</sup> |

## Lipophilicity

|                                         |      |
|-----------------------------------------|------|
| Log $P_{o/w}$ (iLOGP) <sup>?</sup>      | 1.92 |
| Log $P_{o/w}$ (XLOGP3) <sup>?</sup>     | 2.48 |
| Log $P_{o/w}$ (WLOGP) <sup>?</sup>      | 1.72 |
| Log $P_{o/w}$ (MLOGP) <sup>?</sup>      | 1.27 |
| Log $P_{o/w}$ (SILICOS-IT) <sup>?</sup> | 3.36 |
| Consensus Log $P_{o/w}$ <sup>?</sup>    | 2.15 |

## Water Solubility

|                                 |                                 |
|---------------------------------|---------------------------------|
| Log S (ESOL) <sup>?</sup>       | -3.48                           |
| Solubility                      | 1.09e-01 mg/ml ; 3.31e-04 mol/l |
| Class <sup>?</sup>              | Soluble                         |
| Log S (Ali) <sup>?</sup>        | -4.19                           |
| Solubility                      | 2.15e-02 mg/ml ; 6.52e-05 mol/l |
| Class <sup>?</sup>              | Moderately soluble              |
| Log S (SILICOS-IT) <sup>?</sup> | -5.48                           |
| Solubility                      | 1.09e-03 mg/ml ; 3.30e-06 mol/l |
| Class <sup>?</sup>              | Moderately soluble              |

## Pharmacokinetics

|                                          |            |
|------------------------------------------|------------|
| GI absorption <sup>?</sup>               | High       |
| BBB permeant <sup>?</sup>                | No         |
| P-gp substrate <sup>?</sup>              | No         |
| CYP1A2 inhibitor <sup>?</sup>            | No         |
| CYP2C19 inhibitor <sup>?</sup>           | No         |
| CYP2C9 inhibitor <sup>?</sup>            | Yes        |
| CYP2D6 inhibitor <sup>?</sup>            | No         |
| CYP3A4 inhibitor <sup>?</sup>            | No         |
| Log $K_p$ (skin permeation) <sup>?</sup> | -6.55 cm/s |

## Druglikeness

|                                    |                  |
|------------------------------------|------------------|
| Lipinski <sup>?</sup>              | Yes; 0 violation |
| Ghose <sup>?</sup>                 | Yes              |
| Veber <sup>?</sup>                 | Yes              |
| Egan <sup>?</sup>                  | Yes              |
| Muegge <sup>?</sup>                | Yes              |
| Bioavailability Score <sup>?</sup> | 0.56             |

## Medicinal Chemistry

|                                      |         |
|--------------------------------------|---------|
| PAINS <sup>?</sup>                   | 0 alert |
| Brenk <sup>?</sup>                   | 0 alert |
| Leadlikeness <sup>?</sup>            | Yes     |
| Synthetic accessibility <sup>?</sup> | 3.14    |

## Molecule 1

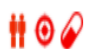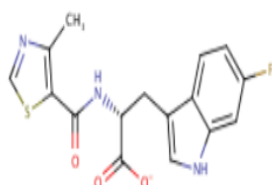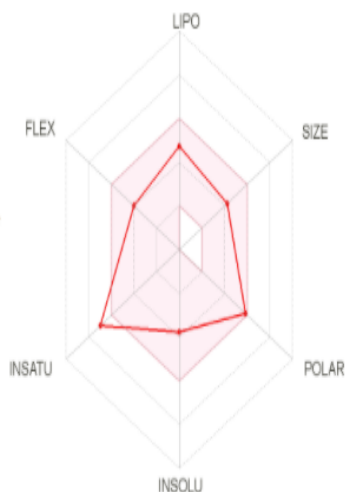

SMILES [O-]C(=O)[C@@H](Cc1c[nH]c2c1ccc(c2)F)NC(=O)c1scnc1C

## Physicochemical Properties

|                        |                       |
|------------------------|-----------------------|
| Formula                | C16H13FN3O3S          |
| Molecular weight       | 346.36 g/mol          |
| Num. heavy atoms       | 24                    |
| Num. arom. heavy atoms | 14                    |
| Fraction Csp3          | 0.19                  |
| Num. rotatable bonds   | 6                     |
| Num. H-bond acceptors  | 5                     |
| Num. H-bond donors     | 2                     |
| Molar Refractivity     | 85.82                 |
| TPSA <sup>?</sup>      | 126.15 Å <sup>2</sup> |

## Lipophilicity

|                                        |      |
|----------------------------------------|------|
| Log $P_{ow}$ (iLOGP) <sup>?</sup>      | 1.57 |
| Log $P_{ow}$ (XLOGP3) <sup>?</sup>     | 2.78 |
| Log $P_{ow}$ (WLOGP) <sup>?</sup>      | 1.58 |
| Log $P_{ow}$ (MLOGP) <sup>?</sup>      | 1.03 |
| Log $P_{ow}$ (SILICOS-IT) <sup>?</sup> | 4.06 |
| Consensus Log $P_{ow}$ <sup>?</sup>    | 2.20 |

## Water Solubility

|                                 |                                 |
|---------------------------------|---------------------------------|
| Log S (ESOL) <sup>?</sup>       | -3.77                           |
| Solubility                      | 5.82e-02 mg/ml ; 1.68e-04 mol/l |
| Class <sup>?</sup>              | Soluble                         |
| Log S (Ali) <sup>?</sup>        | -5.09                           |
| Solubility                      | 2.85e-03 mg/ml ; 8.22e-06 mol/l |
| Class <sup>?</sup>              | Moderately soluble              |
| Log S (SILICOS-IT) <sup>?</sup> | -5.15                           |
| Solubility                      | 2.43e-03 mg/ml ; 7.01e-06 mol/l |
| Class <sup>?</sup>              | Moderately soluble              |

## Pharmacokinetics

|                                          |            |
|------------------------------------------|------------|
| GI absorption <sup>?</sup>               | High       |
| BBB permeant <sup>?</sup>                | No         |
| P-gp substrate <sup>?</sup>              | No         |
| CYP1A2 inhibitor <sup>?</sup>            | No         |
| CYP2C19 inhibitor <sup>?</sup>           | Yes        |
| CYP2C9 inhibitor <sup>?</sup>            | Yes        |
| CYP2D6 inhibitor <sup>?</sup>            | No         |
| CYP3A4 inhibitor <sup>?</sup>            | No         |
| Log $K_p$ (skin permeation) <sup>?</sup> | -6.44 cm/s |

## Druglikeness

|                                    |                  |
|------------------------------------|------------------|
| Lipinski <sup>?</sup>              | Yes; 0 violation |
| Ghose <sup>?</sup>                 | Yes              |
| Veber <sup>?</sup>                 | Yes              |
| Egan <sup>?</sup>                  | Yes              |
| Muegge <sup>?</sup>                | Yes              |
| Bioavailability Score <sup>?</sup> | 0.56             |

## Medicinal Chemistry

|                                      |         |
|--------------------------------------|---------|
| PAINS <sup>?</sup>                   | 0 alert |
| Brenk <sup>?</sup>                   | 0 alert |
| Leadlikeness <sup>?</sup>            | Yes     |
| Synthetic accessibility <sup>?</sup> | 3.12    |

## Molecule 1

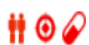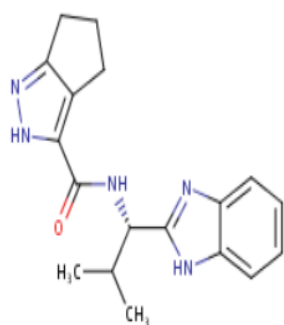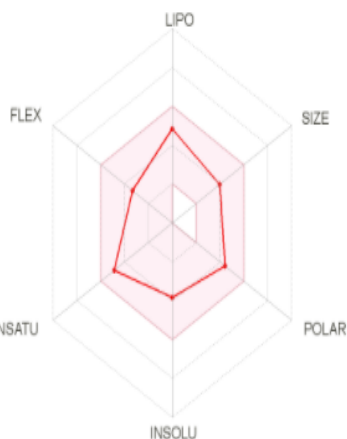

SMILES O=C(c1[nH]nc2c1CCC2)N[C@@H](c1nc2c([nH]1)cccc2)C(C)C

## Physicochemical Properties

|                        |                      |
|------------------------|----------------------|
| Formula                | C18H21N5O            |
| Molecular weight       | 323.39 g/mol         |
| Num. heavy atoms       | 24                   |
| Num. arom. heavy atoms | 14                   |
| Fraction Csp3          | 0.39                 |
| Num. rotatable bonds   | 5                    |
| Num. H-bond acceptors  | 3                    |
| Num. H-bond donors     | 3                    |
| Molar Refractivity     | 92.77                |
| TPSA <sup>?</sup>      | 86.46 Å <sup>2</sup> |

## Lipophilicity

|                                         |      |
|-----------------------------------------|------|
| Log $P_{o/w}$ (iLOGP) <sup>?</sup>      | 1.73 |
| Log $P_{o/w}$ (XLOGP3) <sup>?</sup>     | 2.97 |
| Log $P_{o/w}$ (WLOGP) <sup>?</sup>      | 2.58 |
| Log $P_{o/w}$ (MLOGP) <sup>?</sup>      | 1.87 |
| Log $P_{o/w}$ (SILICOS-IT) <sup>?</sup> | 3.86 |
| Consensus Log $P_{o/w}$ <sup>?</sup>    | 2.60 |

## Water Solubility

|                                 |                                 |
|---------------------------------|---------------------------------|
| Log S (ESOL) <sup>?</sup>       | -3.82                           |
| Solubility                      | 4.92e-02 mg/ml ; 1.52e-04 mol/l |
| Class <sup>?</sup>              | Soluble                         |
| Log S (Ali) <sup>?</sup>        | -4.45                           |
| Solubility                      | 1.15e-02 mg/ml ; 3.56e-05 mol/l |
| Class <sup>?</sup>              | Moderately soluble              |
| Log S (SILICOS-IT) <sup>?</sup> | -5.95                           |
| Solubility                      | 3.67e-04 mg/ml ; 1.14e-06 mol/l |
| Class <sup>?</sup>              | Moderately soluble              |

## Pharmacokinetics

|                                          |            |
|------------------------------------------|------------|
| GI absorption <sup>?</sup>               | High       |
| BBB permeant <sup>?</sup>                | No         |
| P-gp substrate <sup>?</sup>              | Yes        |
| CYP1A2 inhibitor <sup>?</sup>            | Yes        |
| CYP2C19 inhibitor <sup>?</sup>           | Yes        |
| CYP2C9 inhibitor <sup>?</sup>            | No         |
| CYP2D6 inhibitor <sup>?</sup>            | Yes        |
| CYP3A4 inhibitor <sup>?</sup>            | Yes        |
| Log $K_p$ (skin permeation) <sup>?</sup> | -6.16 cm/s |

## Druglikeness

|                                    |                  |
|------------------------------------|------------------|
| Lipinski <sup>?</sup>              | Yes; 0 violation |
| Ghose <sup>?</sup>                 | Yes              |
| Veber <sup>?</sup>                 | Yes              |
| Egan <sup>?</sup>                  | Yes              |
| Muegge <sup>?</sup>                | Yes              |
| Bioavailability Score <sup>?</sup> | 0.55             |

## Medicinal Chemistry

|                                      |         |
|--------------------------------------|---------|
| PAINS <sup>?</sup>                   | 0 alert |
| Brenk <sup>?</sup>                   | 0 alert |
| Leadlikeness <sup>?</sup>            | Yes     |
| Synthetic accessibility <sup>?</sup> | 3.39    |

## Molecule 1

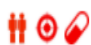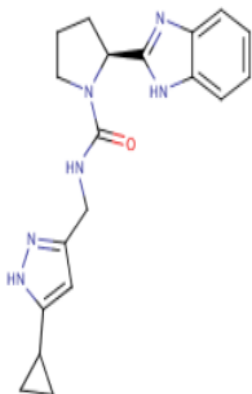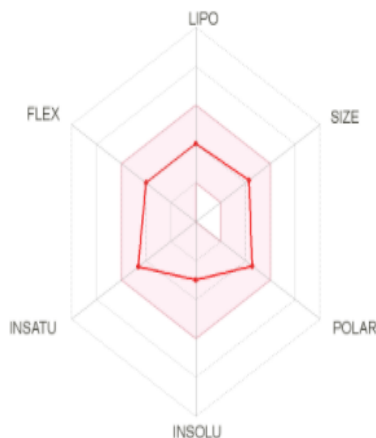

SMILES O=C(N1CCC[C@H]1c1nc2c([nH]1)cccc2)Nc1n[nH]c(c1)C1CC1

## Physicochemical Properties

|                           |                                                  |
|---------------------------|--------------------------------------------------|
| Formula                   | C <sub>19</sub> H <sub>22</sub> N <sub>6</sub> O |
| Molecular weight          | 350.42 g/mol                                     |
| Num. heavy atoms          | 26                                               |
| Num. arom. heavy atoms    | 14                                               |
| Fraction Csp <sup>3</sup> | 0.42                                             |
| Num. rotatable bonds      | 6                                                |
| Num. H-bond acceptors     | 3                                                |
| Num. H-bond donors        | 3                                                |
| Molar Refractivity        | 102.28                                           |
| TPSA <sup>?</sup>         | 89.70 Å <sup>2</sup>                             |

## Lipophilicity

|                                                       |      |
|-------------------------------------------------------|------|
| Log <i>P</i> <sub>o/w</sub> (iLOGP) <sup>?</sup>      | 2.62 |
| Log <i>P</i> <sub>o/w</sub> (XLOGP3) <sup>?</sup>     | 1.57 |
| Log <i>P</i> <sub>o/w</sub> (WLOGP) <sup>?</sup>      | 2.29 |
| Log <i>P</i> <sub>o/w</sub> (MLOGP) <sup>?</sup>      | 1.84 |
| Log <i>P</i> <sub>o/w</sub> (SILICOS-IT) <sup>?</sup> | 2.79 |
| Consensus Log <i>P</i> <sub>o/w</sub> <sup>?</sup>    | 2.22 |

## Water Solubility

|                                 |                                 |
|---------------------------------|---------------------------------|
| Log S (ESOL) <sup>?</sup>       | -3.00                           |
| Solubility                      | 3.47e-01 mg/ml ; 9.90e-04 mol/l |
| Class <sup>?</sup>              | Soluble                         |
| Log S (Ali) <sup>?</sup>        | -3.06                           |
| Solubility                      | 3.02e-01 mg/ml ; 8.63e-04 mol/l |
| Class <sup>?</sup>              | Soluble                         |
| Log S (SILICOS-IT) <sup>?</sup> | -5.45                           |
| Solubility                      | 1.25e-03 mg/ml ; 3.58e-06 mol/l |
| Class <sup>?</sup>              | Moderately soluble              |

## Pharmacokinetics

|                                                          |            |
|----------------------------------------------------------|------------|
| GI absorption <sup>?</sup>                               | High       |
| BBB permeant <sup>?</sup>                                | No         |
| P-gp substrate <sup>?</sup>                              | Yes        |
| CYP1A2 inhibitor <sup>?</sup>                            | Yes        |
| CYP2C19 inhibitor <sup>?</sup>                           | Yes        |
| CYP2C9 inhibitor <sup>?</sup>                            | No         |
| CYP2D6 inhibitor <sup>?</sup>                            | Yes        |
| CYP3A4 inhibitor <sup>?</sup>                            | Yes        |
| Log <i>K</i> <sub>p</sub> (skin permeation) <sup>?</sup> | -7.32 cm/s |

## Druglikeness

|                                    |                  |
|------------------------------------|------------------|
| Lipinski <sup>?</sup>              | Yes; 0 violation |
| Ghose <sup>?</sup>                 | Yes              |
| Veber <sup>?</sup>                 | Yes              |
| Egan <sup>?</sup>                  | Yes              |
| Muegge <sup>?</sup>                | Yes              |
| Bioavailability Score <sup>?</sup> | 0.55             |

## Medicinal Chemistry

|                                      |                         |
|--------------------------------------|-------------------------|
| PAINS <sup>?</sup>                   | 0 alert                 |
| Brenk <sup>?</sup>                   | 0 alert                 |
| Leadlikeness <sup>?</sup>            | No; 1 violation: MW>350 |
| Synthetic accessibility <sup>?</sup> | 3.39                    |

|                  |                  |                                                                                        |
|------------------|------------------|----------------------------------------------------------------------------------------|
| 17<br>(3 stars)* | ZINC000113844870 | [O-]P([O-]<br>) (=O)O[C@@H](O)[C@@H]1[C@@H](O)[C@H](O)[C@@H](O1)n(cn2)c(c2<br>3)ncnc3N |
|------------------|------------------|----------------------------------------------------------------------------------------|

## Molecule 1

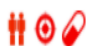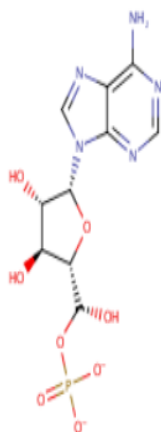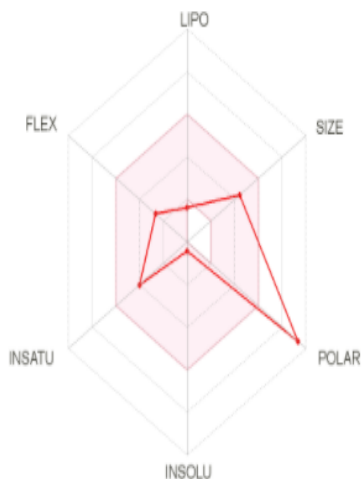

SMILES O[C@@H]([C@H]1O[C@H]([C@H]([C@H]([C@@H]1O)O)n1cnc2c1ncnc2N)OP(=O)([O-])[O-]

### Physicochemical Properties

|                        |                       |
|------------------------|-----------------------|
| Formula                | C10H12N5O8P           |
| Molecular weight       | 361.20 g/mol          |
| Num. heavy atoms       | 24                    |
| Num. arom. heavy atoms | 9                     |
| Fraction Csp3          | 0.50                  |
| Num. rotatable bonds   | 4                     |
| Num. H-bond acceptors  | 11                    |
| Num. H-bond donors     | 4                     |
| Molar Refractivity     | 71.68                 |
| TPSA <sup>?</sup>      | 221.77 Å <sup>2</sup> |

### Lipophilicity

|                                        |       |
|----------------------------------------|-------|
| Log $P_{ow}$ (iLOGP) <sup>?</sup>      | -0.15 |
| Log $P_{ow}$ (XLOGP3) <sup>?</sup>     | -2.67 |
| Log $P_{ow}$ (WLOGP) <sup>?</sup>      | -1.98 |
| Log $P_{ow}$ (MLOGP) <sup>?</sup>      | -3.40 |
| Log $P_{ow}$ (SILICOS-IT) <sup>?</sup> | -4.29 |
| Consensus Log $P_{ow}$ <sup>?</sup>    | -2.50 |

### Water Solubility

|                                 |                                 |
|---------------------------------|---------------------------------|
| Log S (ESOL) <sup>?</sup>       | -0.41                           |
| Solubility                      | 1.40e+02 mg/ml ; 3.88e-01 mol/l |
| Class <sup>?</sup>              | Very soluble                    |
| Log S (Ali) <sup>?</sup>        | -1.44                           |
| Solubility                      | 1.32e+01 mg/ml ; 3.65e-02 mol/l |
| Class <sup>?</sup>              | Very soluble                    |
| Log S (SILICOS-IT) <sup>?</sup> | 2.21                            |
| Solubility                      | 5.82e+04 mg/ml ; 1.61e+02 mol/l |
| Class <sup>?</sup>              | Soluble                         |

### Pharmacokinetics

|                                          |             |
|------------------------------------------|-------------|
| GI absorption <sup>?</sup>               | Low         |
| BBB permeant <sup>?</sup>                | No          |
| P-gp substrate <sup>?</sup>              | No          |
| CYP1A2 inhibitor <sup>?</sup>            | No          |
| CYP2C19 inhibitor <sup>?</sup>           | No          |
| CYP2C9 inhibitor <sup>?</sup>            | No          |
| CYP2D6 inhibitor <sup>?</sup>            | No          |
| CYP3A4 inhibitor <sup>?</sup>            | No          |
| Log $K_p$ (skin permeation) <sup>?</sup> | -10.40 cm/s |

### Druglikeness

|                                    |                                                 |
|------------------------------------|-------------------------------------------------|
| Lipinski <sup>?</sup>              | Yes; 1 violation: NorO>10                       |
| Ghose <sup>?</sup>                 | No; 1 violation: WLOGP<-0.4                     |
| Veber <sup>?</sup>                 | No; 1 violation: TPSA>140                       |
| Egan <sup>?</sup>                  | No; 1 violation: TPSA>131.6                     |
| Muegge <sup>?</sup>                | No; 3 violations: XLOGP3<-2, TPSA>150, H-acc>10 |
| Bioavailability Score <sup>?</sup> | 0.11                                            |

### Medicinal Chemistry

|                                      |                                                        |
|--------------------------------------|--------------------------------------------------------|
| PAINS <sup>?</sup>                   | 0 alert                                                |
| Brenk <sup>?</sup>                   | 2 alerts: het-C-het_not_in_ring, phosphor <sup>?</sup> |
| Leadlikeness <sup>?</sup>            | No; 1 violation: MW>350                                |
| Synthetic accessibility <sup>?</sup> | 4.47                                                   |

## Molecule 1

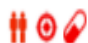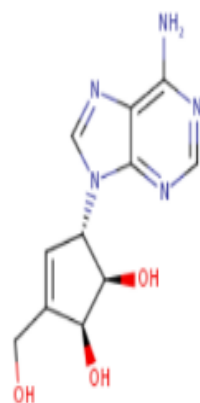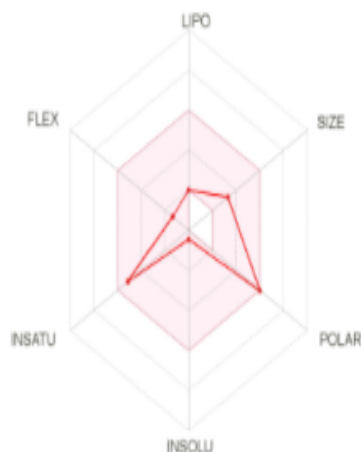

SMILES OCC1=C[C@@H]([C@@H](O)[C@H]1O)n(cn2)c(c23)ncnc3N

## Physicochemical Properties

|                           |                                                               |
|---------------------------|---------------------------------------------------------------|
| Formula                   | C <sub>11</sub> H <sub>13</sub> N <sub>5</sub> O <sub>3</sub> |
| Molecular weight          | 263.25 g/mol                                                  |
| Num. heavy atoms          | 19                                                            |
| Num. arom. heavy atoms    | 9                                                             |
| Fraction Csp <sup>3</sup> | 0.36                                                          |
| Num. rotatable bonds      | 2                                                             |
| Num. H-bond acceptors     | 6                                                             |
| Num. H-bond donors        | 4                                                             |
| Molar Refractivity        | 65.92                                                         |
| TPSA                      | 130.31 Å <sup>2</sup>                                         |

## Lipophilicity

|                                         |       |
|-----------------------------------------|-------|
| Log <i>P</i> <sub>ow</sub> (iLOGP)      | 0.98  |
| Log <i>P</i> <sub>ow</sub> (XLOGP3)     | -1.98 |
| Log <i>P</i> <sub>ow</sub> (WLOGP)      | -1.39 |
| Log <i>P</i> <sub>ow</sub> (MLOGP)      | -1.73 |
| Log <i>P</i> <sub>ow</sub> (SILICOS-IT) | -1.81 |
| Consensus Log <i>P</i> <sub>ow</sub>    | -1.19 |

## Water Solubility

|                           |                                 |
|---------------------------|---------------------------------|
| Log <i>S</i> (ESOL)       | -0.44                           |
| Solubility                | 9.49e+01 mg/ml ; 3.60e-01 mol/l |
| Class                     | Very soluble                    |
| Log <i>S</i> (All)        | -0.23                           |
| Solubility                | 1.54e+02 mg/ml ; 5.85e-01 mol/l |
| Class                     | Very soluble                    |
| Log <i>S</i> (SILICOS-IT) | -0.11                           |
| Solubility                | 2.03e+02 mg/ml ; 7.73e-01 mol/l |
| Class                     | Soluble                         |

## Pharmacokinetics

|                                             |            |
|---------------------------------------------|------------|
| GI absorption                               | Low        |
| BBB permeant                                | No         |
| P-gp substrate                              | No         |
| CYP1A2 inhibitor                            | No         |
| CYP2C19 inhibitor                           | No         |
| CYP2C9 inhibitor                            | No         |
| CYP2D6 inhibitor                            | No         |
| CYP3A4 inhibitor                            | No         |
| Log <i>K</i> <sub>p</sub> (skin permeation) | -9.31 cm/s |

## Druglikeness

|                       |                             |
|-----------------------|-----------------------------|
| Lipinski              | Yes; 0 violation            |
| Ghose                 | No; 1 violation: WLOGP<-0.4 |
| Veber                 | Yes                         |
| Egan                  | Yes                         |
| Muegge                | Yes                         |
| Bioavailability Score | 0.55                        |

## Medicinal Chemistry

|                         |                          |
|-------------------------|--------------------------|
| PAINS                   | 0 alert                  |
| Brenk                   | 1 alert: isolated_alkene |
| Leadlikeness            | Yes                      |
| Synthetic accessibility | 3.87                     |

## Molecule 1

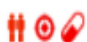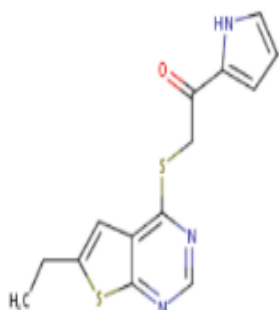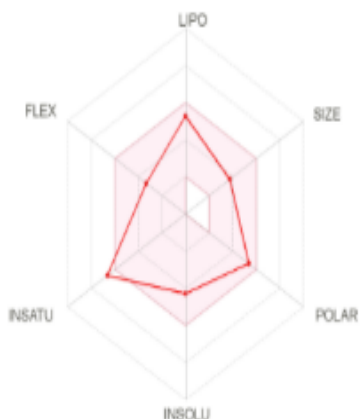

SMILES CCc1sc2c(c1)c(ncn2)SCC(=O)c1ccc[nH]1

## Physicochemical Properties

|                           |                                                                              |
|---------------------------|------------------------------------------------------------------------------|
| Formula                   | C <sub>14</sub> H <sub>13</sub> N <sub>3</sub> O <sub>2</sub> S <sub>2</sub> |
| Molecular weight          | 303.40 g/mol                                                                 |
| Num. heavy atoms          | 20                                                                           |
| Num. arom. heavy atoms    | 14                                                                           |
| Fraction Csp <sup>3</sup> | 0.21                                                                         |
| Num. rotatable bonds      | 5                                                                            |
| Num. H-bond acceptors     | 3                                                                            |
| Num. H-bond donors        | 1                                                                            |
| Molar Refractivity        | 82.98                                                                        |
| TPSA <sup>①</sup>         | 112.18 Å <sup>2</sup>                                                        |

## Lipophilicity

|                                                      |      |
|------------------------------------------------------|------|
| Log <i>P</i> <sub>ow</sub> (iLOGP) <sup>①</sup>      | 2.41 |
| Log <i>P</i> <sub>ow</sub> (XLOGP3) <sup>②</sup>     | 3.77 |
| Log <i>P</i> <sub>ow</sub> (WLOGP) <sup>③</sup>      | 3.56 |
| Log <i>P</i> <sub>ow</sub> (MLOGP) <sup>④</sup>      | 1.30 |
| Log <i>P</i> <sub>ow</sub> (SILICOS-IT) <sup>⑤</sup> | 4.82 |
| Consensus Log <i>P</i> <sub>ow</sub> <sup>⑥</sup>    | 3.17 |

## Water Solubility

|                                 |                                 |
|---------------------------------|---------------------------------|
| Log S (ESOL) <sup>①</sup>       | -4.28                           |
| Solubility                      | 1.58e-02 mg/ml ; 5.20e-05 mol/l |
| Class <sup>②</sup>              | Moderately soluble              |
| Log S (All) <sup>③</sup>        | -5.82                           |
| Solubility                      | 4.60e-04 mg/ml ; 1.52e-06 mol/l |
| Class <sup>④</sup>              | Moderately soluble              |
| Log S (SILICOS-IT) <sup>⑤</sup> | -5.57                           |
| Solubility                      | 8.19e-04 mg/ml ; 2.70e-06 mol/l |
| Class <sup>⑥</sup>              | Moderately soluble              |

## Pharmacokinetics

|                                                          |            |
|----------------------------------------------------------|------------|
| GI absorption <sup>①</sup>                               | High       |
| BBB permeant <sup>②</sup>                                | No         |
| P-gp substrate <sup>③</sup>                              | No         |
| CYP1A2 inhibitor <sup>④</sup>                            | Yes        |
| CYP2C19 inhibitor <sup>⑤</sup>                           | Yes        |
| CYP2C9 inhibitor <sup>⑥</sup>                            | Yes        |
| CYP2D6 inhibitor <sup>⑦</sup>                            | Yes        |
| CYP3A4 inhibitor <sup>⑧</sup>                            | Yes        |
| Log <i>K</i> <sub>p</sub> (skin permeation) <sup>⑨</sup> | -5.47 cm/s |

## Druglikeness

|                                    |                  |
|------------------------------------|------------------|
| Lipinski <sup>①</sup>              | Yes; 0 violation |
| Ghose <sup>②</sup>                 | Yes              |
| Veber <sup>③</sup>                 | Yes              |
| Egan <sup>④</sup>                  | Yes              |
| Muegge <sup>⑤</sup>                | Yes              |
| Bioavailability Score <sup>⑥</sup> | 0.55             |

## Medicinal Chemistry

|                                      |                             |
|--------------------------------------|-----------------------------|
| PAINS <sup>①</sup>                   | 0 alert                     |
| Brenk <sup>②</sup>                   | 0 alert                     |
| Leadlikeness <sup>③</sup>            | No; 1 violation: XLOGP3>3.5 |
| Synthetic accessibility <sup>④</sup> | 3.08                        |



|    |                  |                                                                      |
|----|------------------|----------------------------------------------------------------------|
| 20 | ZINC000005615258 | COP(=O)(OC)[C@@H]1[C@@H](O)[C@H](O)[C@@H](O1)n(cnc2)c(c23)n<br>cnc3N |
|----|------------------|----------------------------------------------------------------------|

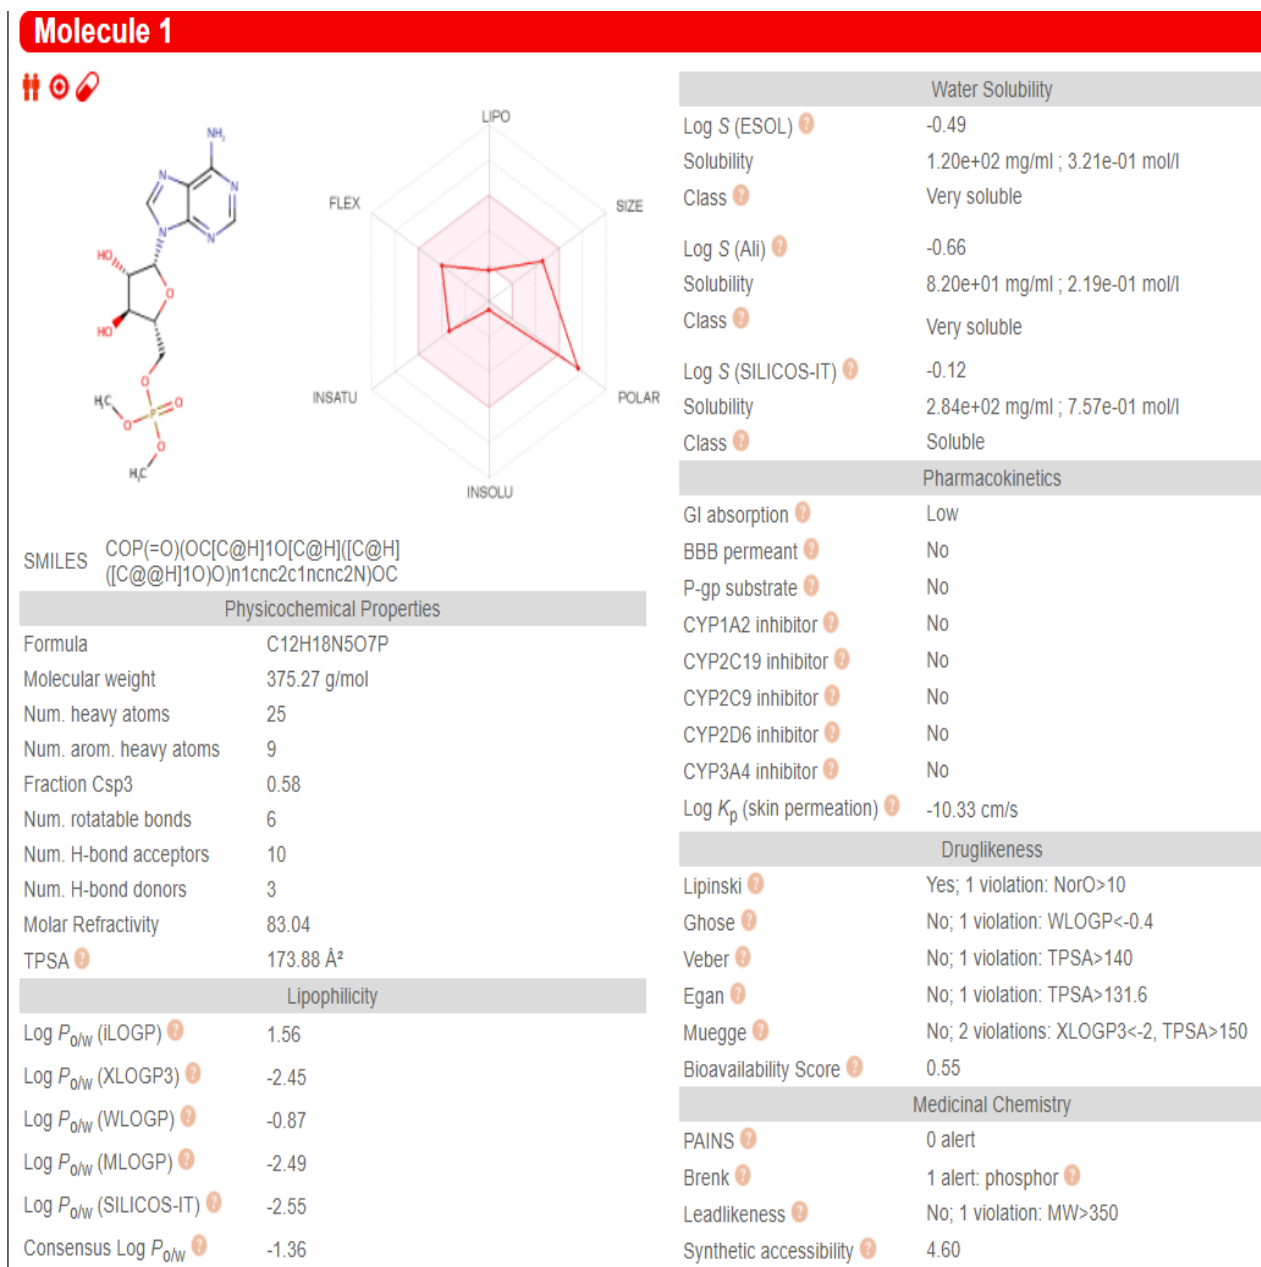

**Figure S9.** The predicted ADME properties for the top 20 best compounds including the reference compound from the SwissADME server.
